# Supplementary material for: A DFT mechanistic study of the organocatalytic asymmetric reaction of aldehydes and homophthalic anhydride
Source: Royal Society of Chemistry journal article supplement (doi:10.1039/c7cc04596d), 2017-01-01
Supplement: c7cc04596d1.pdf [file c7cc04596d1.pdf]

# A DFT Mechanistic Study of the Organocatalytic Asymmetric Reaction of Aldehydes and Homophthalic Anhydride

Cristina Trujillo, Isabel Rozas,\* Astrid Botte, Stephen J. Connon\*

*School of Chemistry, Trinity Biomedical Sciences Institute, Trinity College Dublin, 152-160 Pearse St., Dublin 2, Ireland*

## *Supplementary Information*

### 1. Experimental Section

- General procedure for the synthesis of product **19a**.
- $^1\text{H}$ ,  $^{13}\text{C}$ ,  $^{19}\text{F}$  NMR spectra and HPLC chromatograms of the final compound (**19a**).

### 2. Computational study

- **Table S1.** G3B3 Optimized Geometries (Cartesian Coordinates in Å) of the Stationary Points in PCM-THF.
- **Fig. S1.** Molecular electrostatic potential (MEP) on the 0.001 a.u. electron density isosurface of the catalyst **3**.
- **Fig. S2.** Molecular graph (QTAIM) for all the complexes in PCM-THF.
- **Table S2.** Electron density [ $\rho(\text{BCP})$ , a.u.] and Laplacian [ $\nabla^2\rho(\text{BCP})$ , a.u.] in PCM-THF.
- **Fig. S3.** Electron Density Shifts of the structures TS **15a-16a** and complex **16a** for the *trans-(R,R)* pathway.
- **Fig. S4.** Potential energy surface for all complexes formed (**15**, **16** and **17**) along the two pathways corresponding to the two major products for the reaction with methylhomophthalic anhydride.
- **Table S3.** Relative energies for all TSs and intermediates formed along the four different pathways for the reaction with methylhomophthalic anhydride in PCM-THF.
- **Fig. S5.** Optimised geometries of TS**15-16** for the different pathways corresponding to the reaction with methylhomophthalic anhydride.

## Experimental section

Prepared according to the procedure<sup>1</sup> using benzaldehyde (**11**, 25  $\mu$ l, 0.246 mmol), and anhydride<sup>2</sup> **18** (43.3 mg, 0.246 mmol). Upon esterification, the reaction gave a mixture of esters in a >99 : 1 (*trans* : *cis*) ratio. The major ester (*trans*-**19**) was purified by flash chromatography, eluting in gradient from 100% hexanes to 10% EtOAc in hexanes, to give a white solid (68.5 mg 94%). M.p. 133-135  $^{\circ}$ C; TLC (hexanes : EtOAc, 9 : 1 v/v):  $R_f$  = 0.26;  $[\alpha]^{20} = +36$  ( $c$  = 0.05,  $\text{CHCl}_3$ ); CSP-HPLC analysis: Chiralcel ODH (4.6 mm x 25 cm), hexane/IPA: 85/15, 0.6 mL  $\text{min}^{-1}$ , RT, UV detection at 254 nm, retention time: 40.92 min (major enantiomer);  $\delta_H$  (400 MHz,  $\text{CDCl}_3$ ): 8.21 (1H, d,  $J$  = 8), 7.62 (1H, t,  $J$  = 7.7), 7.49 (1H, t,  $J$  = 7.7), 7.36 (5H, m), 7.12 (1H, d,  $J$  = 7.8), 6.08 (1H, s), 3.79 (3H, s), 1.37 (3H, s);  $\delta_C$  (100 MHz,  $\text{CDCl}_3$ ): 172.6, 164.5, 144.5, m 134.8, 134.6, 130.8, 128.9, 128.4, 128.3 2C), 127.1 (2C), 125.2, 123.1, 82.6, 77.2, 52.6, 18.5;  $\nu_{\text{max}}$  (neat)/ $\text{cm}^{-1}$ ): 3292, 3080, 2950, 1719, 1600, 1454, 1383, 1291, 1249, 1125, 1098, 1056, 976, 801, 758, 691; HRMS ( $m/z$  – ESI): Found: 319.0941 ( $\text{M}^+ + \text{Na}$ )  $\text{C}_{18}\text{H}_{16}\text{NaO}_4$  requires: 319.0940.

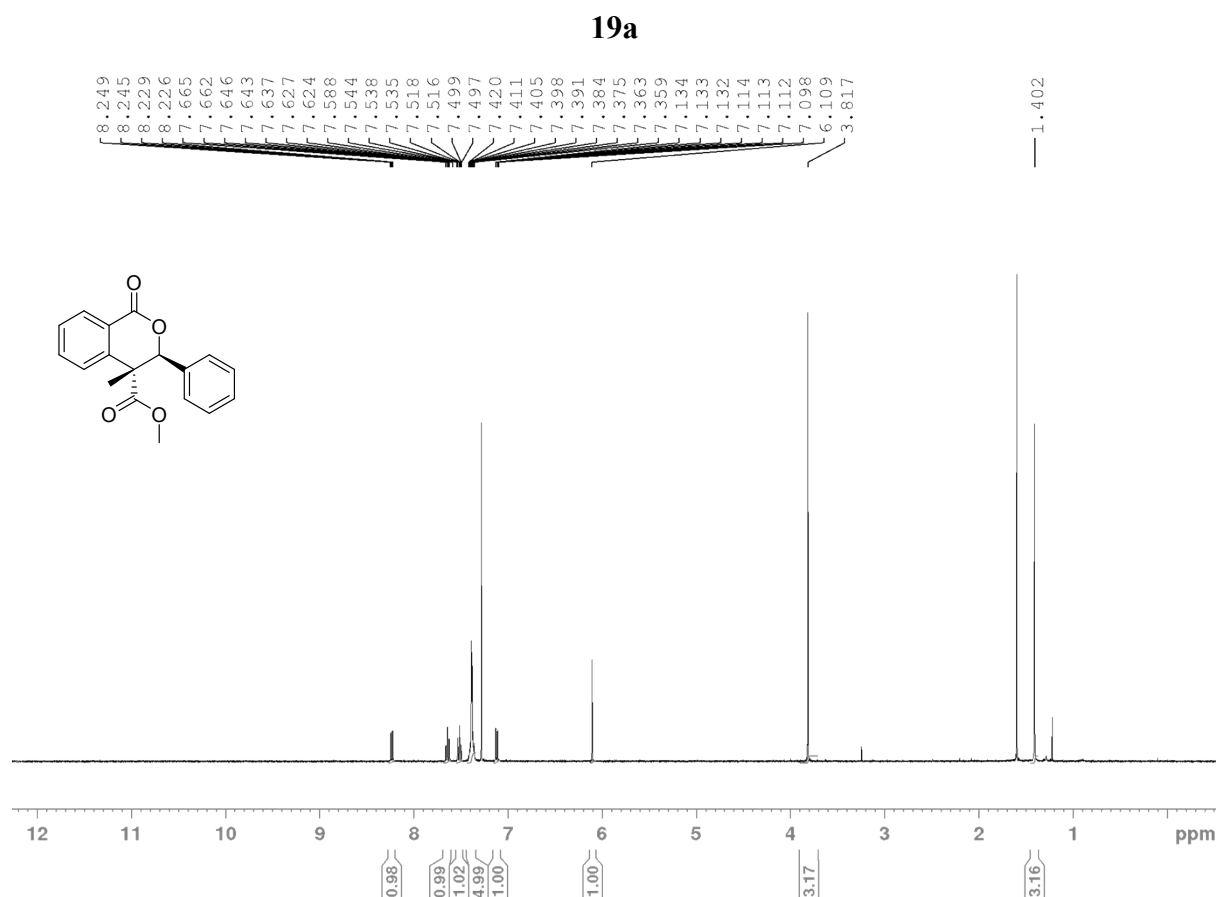

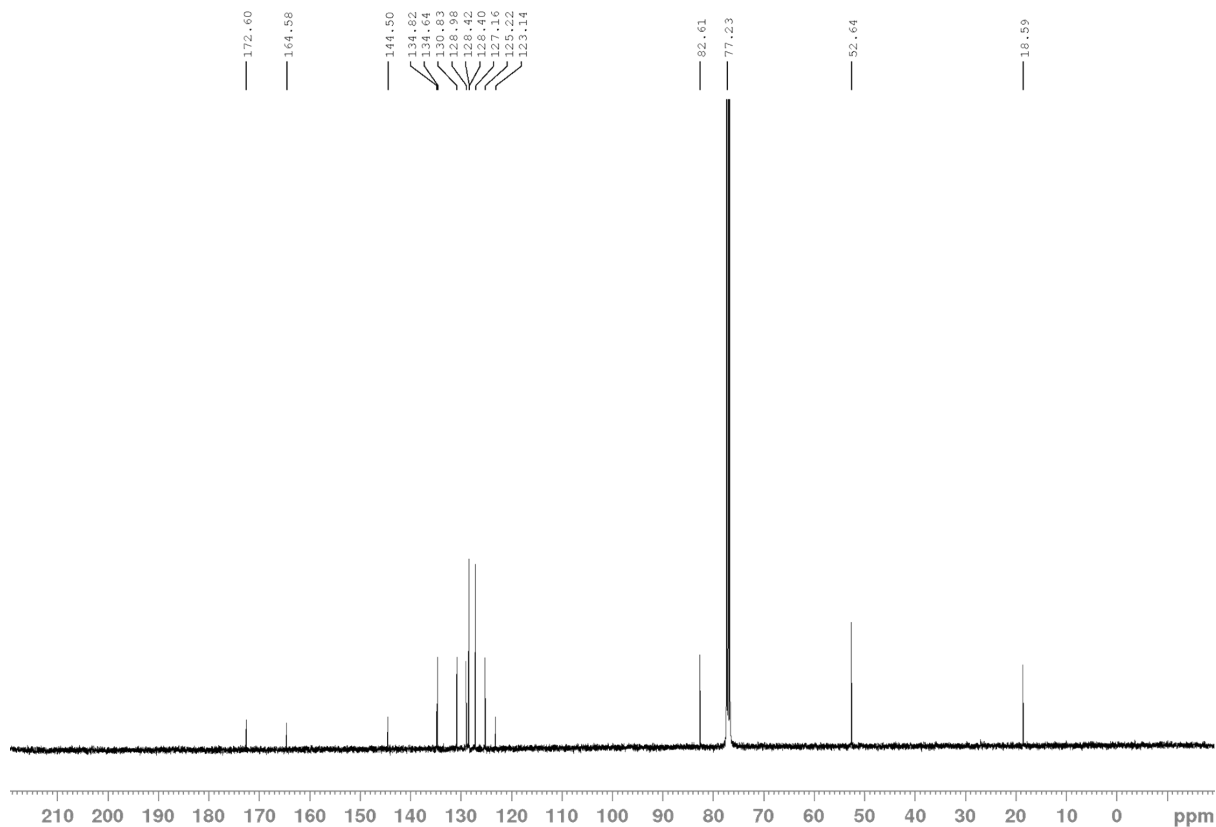

### HPLC Data

|                         |                         |                         |               |
|-------------------------|-------------------------|-------------------------|---------------|
| <b>Racemic</b>          | <b>85H15IPA06mlmin</b>  | <i>Bandwidth:</i>       | <b>n.a.</b>   |
| <i>Control Program:</i> |                         | <i>Dilution Factor:</i> | <b>1.0000</b> |
| <i>Quantif. Method:</i> | <b>fmm</b>              | <i>Sample Weight:</i>   | <b>1.0000</b> |
| <i>Recording Time:</i>  | <b>26/09/2016 10:57</b> | <i>Sample Amount:</i>   | <b>1.0000</b> |
| <i>Run Time (min):</i>  | <b>47.54</b>            |                         |               |

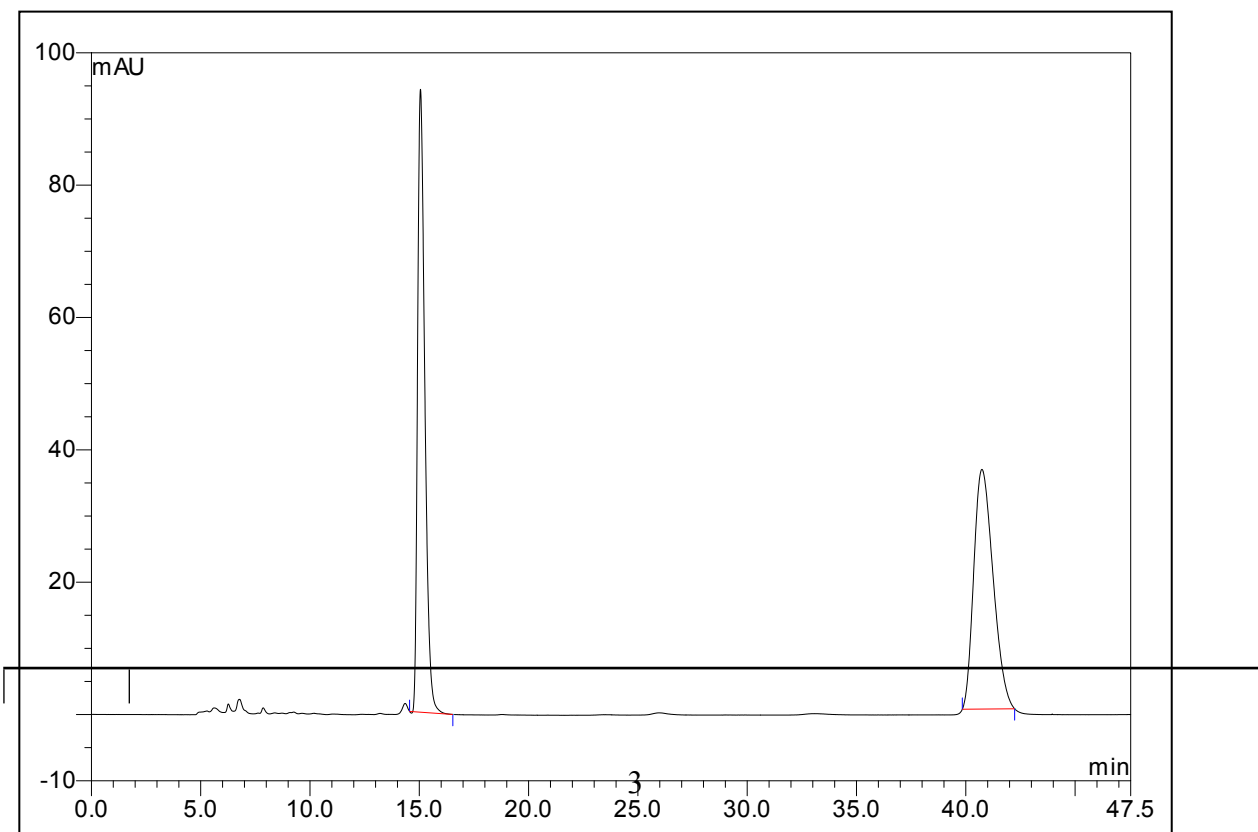

| No.           | Ret.Time<br>min | Peak Name | Height<br>mAU | Area<br>mAU*min | Rel.Area<br>% | Amount | Type |
|---------------|-----------------|-----------|---------------|-----------------|---------------|--------|------|
| 1             | 15.05           | n.a.      | 94.125        | 36.098          | 49.33         | n.a.   | BMB* |
| 2             | 40.73           | n.a.      | 36.214        | 37.083          | 50.67         | n.a.   | BMB* |
| <b>Total:</b> |                 |           | 130.340       | 73.180          | 100.00        | 0.000  |      |

|                  |                         |                   |                 |
|------------------|-------------------------|-------------------|-----------------|
| Sample Name:     | <b>19a</b>              | Injection Volume: | <b>20.0</b>     |
| Vial Number:     | <b>RB5</b>              | Channel:          | <b>UV_VIS_1</b> |
| Sample Type:     | <b>unknown</b>          | Wavelength:       | <b>254</b>      |
| Control Program: | <b>85H15IPA06mlmin</b>  | Bandwidth:        | <b>n.a.</b>     |
| Quantif. Method: | <b>fmm</b>              | Dilution Factor:  | <b>1.0000</b>   |
| Recording Time:  | <b>01/04/2017 20:14</b> | Sample Weight:    | <b>1.0000</b>   |
| Run Time (min):  | <b>56.53</b>            | Sample Amount:    | <b>1.0000</b>   |

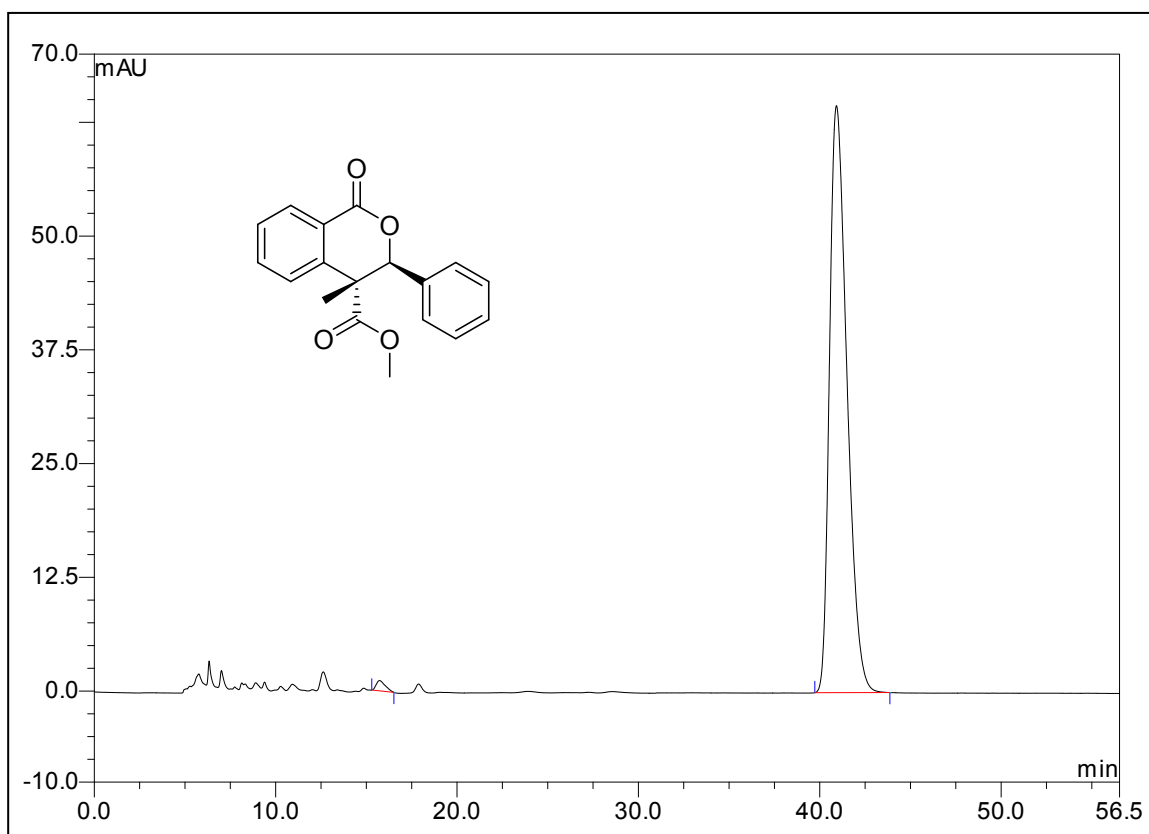

| No.           | Ret.Time<br>min | Peak Name | Height<br>mAU | Area<br>mAU*min | Rel.Area<br>% | Amount | Type |
|---------------|-----------------|-----------|---------------|-----------------|---------------|--------|------|
| 1             | 15.73           | n.a.      | 1.135         | 0.659           | 0.91          | n.a.   | BMB* |
| 2             | 40.92           | n.a.      | 64.516        | 71.972          | 99.09         | n.a.   | BMB* |
| <b>Total:</b> |                 |           | 65.651        | 72.631          | 100.00        | 0.000  |      |

## Computational Study

The geometry of the isolated molecules as well as those of the different stationary structures of the Potential Energy Surface (PES) were optimized by using the B3LYP<sup>3</sup> density functional theory (DFT) approach, which combines the Becke's three-parameter nonlocal hybrid exchange potential with the nonlocal correlation functional of Lee, Yang and Parr with standard 6-31G(d)<sup>4</sup> basis sets. Vibrational analyses were performed to confirm that the different optimized structures corresponded to true minima of the PES or to transition states. All these calculations were carried out with the Gaussian09 program.<sup>5</sup> The self-consistent reaction field (SCRF) calculations using the PCM solvation model were carried out re-optimising the gas-phase optimised structures. The dielectric constant in the PCM calculations was set to  $\epsilon = 2.379$  to simulate tetrahydrofuran (THF) similar to the solvent medium used in the experimental studies. Finally, more reliable energies for both local minima and transition states were re-evaluated at the B3LYP/6-31+G(d,p) in PCM-THF conditions.

The characteristics of the intermolecular interactions were analysed by means of the Atoms in Molecules (QTAIM) theory.<sup>6</sup> For this purpose we have located the most relevant bond critical points (BCP), and evaluated the electron density at each of them, by using the QTAIMAll program.<sup>7</sup>

**Table S1.** G3B3 Optimized Geometries (Cartesian Coordinates in Å) of the Stationary Points in PCM-THF.

| Complex 15a |         |         | <i>trans</i> -(R,R)<br>TS 15a-16a |   |         | Complex 16a |         |   |         |         |         |
|-------------|---------|---------|-----------------------------------|---|---------|-------------|---------|---|---------|---------|---------|
| C           | 0.4942  | 3.3402  | 0.9425                            | C | 0.1632  | -2.5800     | -2.1817 | C | 0.0433  | -2.7677 | -2.0742 |
| C           | 0.3101  | 1.9937  | 0.3782                            | C | 0.1563  | -1.6395     | -1.0478 | C | 0.0489  | -1.7570 | -0.9960 |
| C           | 1.6641  | 1.9153  | -0.0199                           | C | 1.5368  | -1.8242     | -0.8136 | C | 1.4220  | -1.9686 | -0.7383 |
| C           | 1.9473  | 3.2828  | 0.4957                            | C | 1.6440  | -2.8113     | -1.9250 | C | 1.5175  | -3.0126 | -1.7917 |
| O           | 2.9068  | 4.0356  | 0.5563                            | O | 2.5140  | -3.5044     | -2.4259 | O | 2.3759  | -3.7524 | -2.2467 |
| O           | -0.2274 | 4.1375  | 1.5355                            | O | -0.6731 | -2.9723     | -2.9885 | O | -0.7934 | -3.1998 | -2.8567 |
| N           | 2.3136  | 0.9011  | -0.6305                           | N | 2.3383  | -1.2450     | 0.1063  | N | 2.2307  | -1.3608 | 0.1629  |
| N           | -0.7206 | 1.1397  | 0.3265                            | N | -0.8008 | -0.8725     | -0.4987 | N | -0.8851 | -0.9405 | -0.4946 |
| H           | 1.7350  | 0.0798  | -0.8479                           | H | 1.8860  | -0.5502     | 0.7066  | H | 1.7902  | -0.6379 | 0.7325  |
| C           | 3.6749  | 0.7606  | -0.9265                           | C | 3.7072  | -1.4288     | 0.3514  | C | 3.5910  | -1.5679 | 0.4332  |
| C           | 4.0765  | -0.4639 | -1.4824                           | C | 4.2722  | -0.6669     | 1.3867  | C | 4.1693  | -0.7703 | 1.4340  |
| C           | 4.6316  | 1.7565  | -0.6809                           | C | 4.5119  | -2.3175     | -0.3743 | C | 4.3777  | -2.5132 | -0.2390 |
| C           | 5.4208  | -0.6977 | -1.7597                           | C | 5.6252  | -0.7937     | 1.6868  | C | 5.5154  | -0.9189 | 1.7541  |

|   |         |         |         |   |         |         |         |   |         |         |         |
|---|---------|---------|---------|---|---------|---------|---------|---|---------|---------|---------|
| H | 3.3330  | -1.2272 | -1.6906 | H | 3.6507  | 0.0206  | 1.9515  | H | 3.5626  | -0.0422 | 1.9632  |
| C | 5.9692  | 1.5034  | -0.9825 | C | 5.8655  | -2.4249 | -0.0549 | C | 5.7236  | -2.6457 | 0.1036  |
| H | 4.3351  | 2.7098  | -0.2538 | H | 4.0878  | -2.9175 | -1.1735 | H | 3.9466  | -3.1310 | -1.0212 |
| C | 6.3833  | 0.2810  | -1.5145 | C | 6.4385  | -1.6722 | 0.9699  | C | 6.3089  | -1.8591 | 1.0953  |
| H | 7.4279  | 0.0961  | -1.7305 | H | 7.4913  | -1.7675 | 1.2050  | H | 7.3551  | -1.9751 | 1.3488  |
| C | 6.9844  | 2.5989  | -0.7831 | C | 6.7401  | -3.3296 | -0.8841 | C | 6.5421  | -3.7134 | -0.5761 |
| C | 5.8313  | -2.0564 | -2.2591 | C | 6.2027  | -0.0178 | 2.8409  | C | 6.1354  | -0.0062 | 2.7786  |
| F | 7.1097  | 3.3672  | -1.8917 | F | 6.0669  | -4.4069 | -1.3405 | F | 6.3884  | -4.9159 | 0.0276  |
| F | 6.6495  | 3.4253  | 0.2306  | F | 7.2324  | -2.6856 | -1.9698 | F | 6.1864  | -3.8770 | -1.8685 |
| F | 8.2132  | 2.1035  | -0.5118 | F | 7.8038  | -3.7828 | -0.1839 | F | 7.8632  | -3.4294 | -0.5522 |
| F | 5.9128  | -2.9552 | -1.2423 | F | 5.5569  | 1.1538  | 3.0360  | F | 6.6228  | 1.1225  | 2.2079  |
| F | 4.9419  | -2.5594 | -3.1430 | F | 6.1163  | -0.7099 | 4.0014  | F | 5.2418  | 0.3857  | 3.7140  |
| F | 7.0381  | -2.0378 | -2.8609 | F | 7.5098  | 0.2665  | 2.6518  | F | 7.1661  | -0.5947 | 3.4218  |
| H | -0.5620 | 0.2525  | -0.1780 | H | -0.5735 | -0.3992 | 0.3763  | H | -0.6562 | -0.4285 | 0.3552  |
| C | -2.1013 | 1.5587  | 0.6184  | C | -2.2255 | -1.0857 | -0.8130 | C | -2.3149 | -1.0723 | -0.8377 |
| C | -2.9376 | 1.6305  | -0.6628 | C | -2.9408 | -1.7559 | 0.3647  | C | -3.0771 | -1.6372 | 0.3657  |
| C | -3.2546 | 2.8800  | -1.2863 | C | -3.3869 | -3.1144 | 0.3150  | C | -3.5839 | -2.9752 | 0.3944  |
| C | -3.3683 | 0.4658  | -1.2631 | C | -3.1328 | -1.0399 | 1.5287  | C | -3.2506 | -0.8466 | 1.4837  |
| C | -2.8664 | 4.1554  | -0.7887 | C | -3.2269 | -3.9776 | -0.8047 | C | -3.4482 | -3.9112 | -0.6687 |
| C | -4.0115 | 2.8062  | -2.5036 | C | -4.0283 | -3.6140 | 1.4980  | C | -4.2620 | -3.3737 | 1.5948  |
| C | -4.1345 | 0.4964  | -2.4603 | C | -3.7890 | -1.6201 | 2.6481  | C | -3.9427 | -1.3281 | 2.6279  |
| H | -3.1003 | -0.4931 | -0.8374 | H | -2.7560 | -0.0269 | 1.6103  | H | -2.8345 | 0.1541  | 1.5081  |
| C | -3.2149 | 5.3071  | -1.4729 | C | -3.6896 | -5.2809 | -0.7522 | C | -3.9701 | -5.1868 | -0.5462 |
| H | -2.2706 | 4.2323  | 0.1112  | H | -2.7095 | -3.6315 | -1.6896 | H | -2.9045 | -3.6409 | -1.5638 |
| C | -4.3501 | 4.0156  | -3.1755 | C | -4.4966 | -4.9593 | 1.5070  | C | -4.7914 | -4.6937 | 1.6767  |
| C | -3.9656 | 5.2322  | -2.6792 | C | -4.3354 | -5.7718 | 0.4169  | C | -4.6532 | -5.5770 | 0.6395  |
| H | -4.9237 | 3.9370  | -4.0936 | H | -4.9829 | -5.3167 | 2.4091  | H | -5.3053 | -4.9742 | 2.5907  |
| H | -4.2190 | 6.1586  | -3.1851 | H | -4.6865 | -6.7989 | 0.4170  | H | -5.0510 | -6.5855 | 0.6953  |
| O | -2.8923 | 6.5691  | -1.0871 | O | -3.5782 | -6.1861 | -1.7586 | O | -3.8855 | -6.1553 | -1.4957 |
| N | -4.4375 | 1.6419  | -3.0569 | N | -4.2224 | -2.8740 | 2.6191  | N | -4.4339 | -2.5602 | 2.6679  |
| C | -2.1821 | 6.7449  | 0.1391  | C | -2.9671 | -5.7703 | -2.9803 | C | -3.2479 | -5.8362 | -2.7328 |
| H | -2.0329 | 7.8204  | 0.2424  | H | -2.9749 | -6.6476 | -3.6283 | H | -3.2864 | -6.7486 | -3.3293 |
| H | -1.2126 | 6.2358  | 0.1209  | H | -1.9365 | -5.4355 | -2.8208 | H | -2.2057 | -5.5343 | -2.5825 |
| H | -2.7672 | 6.3714  | 0.9883  | H | -3.5396 | -4.9611 | -3.4499 | H | -3.7828 | -5.0330 | -3.2540 |
| C | -4.6208 | -0.7589 | -3.0943 | C | -4.0129 | -0.8440 | 3.8982  | C | -4.1418 | -0.4713 | 3.8294  |
| C | -4.9840 | -0.7578 | -4.4525 | C | -4.2881 | -1.5237 | 5.0979  | C | -4.4807 | -1.0665 | 5.0577  |
| C | -4.7387 | -1.9585 | -2.3706 | C | -3.9662 | 0.5612  | 3.9211  | C | -4.0087 | 0.9278  | 3.7801  |
| C | -5.4389 | -1.9202 | -5.0703 | C | -4.4992 | -0.8237 | 6.2832  | C | -4.6714 | -0.2919 | 6.1993  |
| H | -4.9001 | 0.1672  | -5.0125 | H | -4.3299 | -2.6073 | 5.0829  | H | -4.5893 | -2.1447 | 5.0991  |
| C | -5.1963 | -3.1216 | -2.9911 | C | -4.1807 | 1.2605  | 5.1093  | C | -4.2028 | 1.7022  | 4.9246  |
| H | -4.4958 | -1.9925 | -1.3129 | H | -3.7824 | 1.1248  | 3.0114  | H | -3.7709 | 1.4315  | 2.8482  |
| C | -5.5453 | -3.1091 | -4.3427 | C | -4.4450 | 0.5731  | 6.2953  | C | -4.5321 | 1.0978  | 6.1391  |
| H | -5.7077 | -1.9000 | -6.1232 | H | -4.7034 | -1.3690 | 7.2009  | H | -4.9267 | -0.7735 | 7.1396  |
| H | -5.2813 | -4.0376 | -2.4131 | H | -4.1462 | 2.3466  | 5.1044  | H | -4.1012 | 2.7823  | 4.8622  |
| H | -5.8987 | -4.0165 | -4.8250 | H | -4.6095 | 1.1198  | 7.2198  | H | -4.6812 | 1.7028  | 7.0293  |
| C | -1.8787 | 1.7886  | 3.7218  | C | -1.9846 | 0.3325  | -3.5056 | C | -2.0583 | 0.1780  | -3.6080 |

|   |         |         |         |   |         |         |         |   |         |         |         |
|---|---------|---------|---------|---|---------|---------|---------|---|---------|---------|---------|
| C | -3.3177 | 2.1884  | 4.1207  | C | -3.3276 | -0.2097 | -4.0500 | C | -3.4590 | -0.2383 | -4.1431 |
| H | -1.2428 | 1.5755  | 4.5830  | H | -1.5208 | 1.0592  | -4.1758 | H | -1.5272 | 0.8072  | -4.3291 |
| C | -2.7631 | 0.6209  | 1.6514  | C | -2.9750 | 0.2155  | -1.2000 | C | -2.9666 | 0.2505  | -1.3215 |
| C | -2.4968 | -0.6099 | 3.7740  | C | -3.0542 | 2.3028  | -2.4914 | C | -2.8901 | 2.2379  | -2.6694 |
| C | -4.3022 | 1.1245  | 3.5995  | C | -4.4835 | 0.4013  | -3.2333 | C | -4.5342 | 0.4683  | -3.2952 |
| H | -3.5664 | 3.1654  | 3.6946  | H | -3.3518 | -1.3025 | -3.9800 | H | -3.5913 | -1.3251 | -4.0785 |
| H | -3.3934 | 2.2783  | 5.2085  | H | -3.4298 | 0.0468  | -5.1090 | H | -3.5656 | 0.0348  | -5.1991 |
| H | -2.7781 | -0.3984 | 1.2628  | H | -3.0523 | 0.8636  | -0.3259 | H | -3.0129 | 0.9431  | -0.4763 |
| C | -4.1910 | 1.0686  | 2.0646  | C | -4.3864 | -0.1033 | -1.7795 | C | -4.4157 | -0.0345 | -1.8439 |
| C | -3.9344 | -0.2443 | 4.2391  | C | -4.3380 | 1.9467  | -3.2846 | C | -4.2696 | 1.9961  | -3.3648 |
| H | -2.4814 | -1.5075 | 3.1524  | H | -3.2749 | 2.7478  | -1.5189 | H | -3.0167 | 2.7826  | -1.7281 |
| H | -1.8045 | -0.7462 | 4.6063  | H | -2.3972 | 2.9873  | -3.0286 | H | -2.2352 | 2.8418  | -3.3041 |
| H | -5.3237 | 1.3910  | 3.8848  | H | -5.4451 | 0.1056  | -3.6624 | H | -5.5330 | 0.2460  | -3.6853 |
| H | -4.9261 | 0.3812  | 1.6391  | H | -5.1603 | 0.3493  | -1.1537 | H | -5.1565 | 0.4451  | -1.1966 |
| H | -4.4116 | 2.0601  | 1.6546  | H | -4.5654 | -1.1831 | -1.7606 | H | -4.6357 | -1.1083 | -1.8207 |
| H | -3.9259 | -0.0988 | 5.3252  | H | -4.1986 | 2.2293  | -4.3350 | H | -4.1882 | 2.2671  | -4.4253 |
| H | -2.0344 | 2.5532  | 1.0556  | H | -2.2375 | -1.7492 | -1.6750 | H | -2.3497 | -1.7823 | -1.6612 |
| N | -1.9299 | 0.5069  | 2.9216  | N | -2.2354 | 1.0600  | -2.2142 | N | -2.1741 | 0.9697  | -2.3568 |
| C | -4.9145 | -1.3468 | 3.9212  | C | -5.5362 | 2.6965  | -2.7619 | C | -5.3632 | 2.8351  | -2.7609 |
| C | -5.7602 | -1.8723 | 4.8088  | C | -6.2966 | 3.5072  | -3.4993 | C | -6.1059 | 3.7175  | -3.4328 |
| H | -4.9040 | -1.7265 | 2.8995  | H | -5.7764 | 2.5564  | -1.7073 | H | -5.5395 | 2.7055  | -1.6916 |
| H | -6.4580 | -2.6583 | 4.5334  | H | -7.1560 | 4.0218  | -3.0782 | H | -6.8835 | 4.2999  | -2.9453 |
| H | -5.7876 | -1.5374 | 5.8441  | H | -6.0885 | 3.6874  | -4.5523 | H | -5.9637 | 3.8913  | -4.4981 |
| C | 2.7773  | -1.5368 | 2.8369  | C | 1.8733  | 3.4524  | -1.7415 | C | 2.1286  | 3.1941  | -1.8877 |
| C | 3.5622  | -2.1612 | 1.8540  | C | 1.3680  | 4.5608  | -2.4290 | C | 1.7408  | 4.2165  | -2.7590 |
| C | 4.8288  | -2.6454 | 2.1723  | C | 2.2276  | 5.4225  | -3.1131 | C | 2.6963  | 4.8916  | -3.5227 |
| C | 5.3066  | -2.5169 | 3.4793  | C | 3.6043  | 5.1840  | -3.1177 | C | 4.0466  | 4.5529  | -3.4217 |
| C | 4.5243  | -1.9035 | 4.4679  | C | 4.1170  | 4.0757  | -2.4368 | C | 4.4399  | 3.5289  | -2.5551 |
| C | 3.2643  | -1.4103 | 4.1502  | C | 3.2545  | 3.2162  | -1.7549 | C | 3.4854  | 2.8532  | -1.7948 |
| H | 3.1750  | -2.2626 | 0.8440  | H | 0.2951  | 4.7233  | -2.4276 | H | 0.6893  | 4.4681  | -2.8410 |
| H | 5.4401  | -3.1076 | 1.4037  | H | 1.8231  | 6.2793  | -3.6463 | H | 2.3827  | 5.6826  | -4.1987 |
| H | 6.2940  | -2.8932 | 3.7318  | H | 4.2734  | 5.8525  | -3.6531 | H | 4.7883  | 5.0777  | -4.0175 |
| H | 4.9065  | -1.8096 | 5.4800  | H | 5.1857  | 3.8775  | -2.4440 | H | 5.4874  | 3.2508  | -2.4774 |
| H | 2.6463  | -0.9232 | 4.8981  | H | 3.6570  | 2.3473  | -1.2365 | H | 3.8002  | 2.0486  | -1.1326 |
| C | 1.4667  | -1.0082 | 2.4531  | C | 0.9271  | 2.5046  | -1.0207 | C | 1.1020  | 2.4469  | -1.0515 |
| O | 0.6967  | -0.4233 | 3.2170  | O | -0.3458 | 2.5759  | -1.3528 | O | -0.2178 | 2.7119  | -1.4448 |
| C | -1.0942 | -7.0325 | -0.8928 | C | 0.7905  | 6.6323  | 1.1775  | C | 1.4474  | 6.6159  | 0.8879  |
| C | -0.2884 | -5.9634 | -1.2369 | C | 1.3749  | 5.3770  | 1.0298  | C | 1.8331  | 5.2884  | 0.6961  |
| C | -0.6116 | -4.6416 | -0.8279 | C | 0.5750  | 4.2273  | 0.9792  | C | 0.8857  | 4.2645  | 0.7692  |
| C | -1.7958 | -4.4728 | -0.0525 | C | -0.8211 | 4.3743  | 1.0761  | C | -0.4504 | 4.5974  | 1.0439  |
| C | -2.6066 | -5.5747 | 0.2886  | C | -1.4105 | 5.6420  | 1.2057  | C | -0.8421 | 5.9324  | 1.2208  |
| C | -2.2649 | -6.8492 | -0.1240 | C | -0.6032 | 6.7703  | 1.2604  | C | 0.1107  | 6.9417  | 1.1445  |
| H | -0.8215 | -8.0327 | -1.2207 | H | 1.4230  | 7.5143  | 1.2263  | H | 2.1950  | 7.4020  | 0.8360  |
| H | 0.6082  | -6.1234 | -1.8302 | H | 2.4538  | 5.2822  | 0.9509  | H | 2.8706  | 5.0485  | 0.4861  |
| C | 0.1927  | -3.5172 | -1.1644 | C | 1.1164  | 2.8792  | 0.7219  | C | 1.2368  | 2.8280  | 0.4997  |
| C | -2.1696 | -3.1437 | 0.3857  | C | -1.6652 | 3.1805  | 1.0881  | C | -1.4571 | 3.5399  | 1.1828  |

|   |         |         |         |   |         |         |         |   |         |         |         |
|---|---------|---------|---------|---|---------|---------|---------|---|---------|---------|---------|
| H | -3.4990 | -5.3950 | 0.8801  | H | -2.4907 | 5.7178  | 1.2757  | H | -1.8832 | 6.1553  | 1.4289  |
| H | -2.8866 | -7.7001 | 0.1370  | H | -1.0480 | 7.7543  | 1.3728  | H | -0.1809 | 7.9771  | 1.2900  |
| C | -0.1539 | -2.2480 | -0.7488 | C | 0.3300  | 1.7880  | 1.2895  | C | 0.3202  | 1.8662  | 1.1994  |
| O | 0.4151  | -1.1384 | -0.9416 | O | 0.7305  | 0.6541  | 1.5474  | O | 0.6171  | 0.7151  | 1.4752  |
| O | -1.3287 | -2.1154 | 0.0282  | O | -1.0234 | 1.9669  | 1.3790  | O | -0.9661 | 2.2338  | 1.4137  |
| O | -3.1618 | -2.8315 | 1.0435  | O | -2.8725 | 3.1282  | 0.9847  | O | -2.6552 | 3.6594  | 1.2000  |
| H | -1.3773 | 2.5453  | 3.1166  | H | -1.2628 | -0.4625 | -3.3232 | H | -1.4296 | -0.6956 | -3.4243 |
| H | 1.0872  | -3.6354 | -1.7652 | H | 2.1758  | 2.7589  | 0.9412  | H | 2.2589  | 2.5978  | 0.8097  |
| H | 1.1905  | -1.1462 | 1.3943  | H | 1.3759  | 1.4906  | -1.0112 | H | 1.3244  | 1.3734  | -1.1070 |
| H | -0.9518 | 0.2291  | 2.6986  | H | -1.3109 | 1.4644  | -1.7992 | H | -0.7040 | 1.8924  | -1.7447 |

| <b>TS 16a-17a</b> |         |         | <b><i>trans</i>-(R,R)</b> | <b>Complex 15b</b> |          |          | <b><i>trans</i>-(S,S)</b> | <b>TS 15b-16b</b> |          |          |          |
|-------------------|---------|---------|---------------------------|--------------------|----------|----------|---------------------------|-------------------|----------|----------|----------|
| C                 | 0.4792  | -2.4468 | -2.1820                   | C                  | -1.46107 | -4.01254 | 0.225477                  | C                 | 0.858396 | -4.03006 | -0.02695 |
| C                 | 0.4005  | -1.5076 | -1.0494                   | C                  | -1.19581 | -2.56557 | 0.229154                  | C                 | 0.750824 | -2.56148 | 0.032708 |
| C                 | 1.8007  | -1.5565 | -0.8428                   | C                  | -2.56327 | -2.2448  | 0.089948                  | C                 | 2.145541 | -2.39571 | 0.126822 |
| C                 | 1.9725  | -2.5416 | -1.9525                   | C                  | -2.94118 | -3.68937 | 0.070085                  | C                 | 2.372715 | -3.86899 | 0.080128 |
| O                 | 2.8868  | -3.1607 | -2.4707                   | O                  | -3.96526 | -4.34757 | -0.02579                  | O                 | 3.328315 | -4.62643 | 0.099912 |
| O                 | -0.3259 | -2.9172 | -2.9800                   | O                  | -0.77034 | -5.02003 | 0.312982                  | O                 | 0.063934 | -4.95324 | -0.13211 |
| N                 | 2.5885  | -0.9126 | 0.0434                    | N                  | -3.15059 | -1.03022 | 0.015093                  | N                 | 2.86079  | -1.25289 | 0.225984 |
| N                 | -0.6494 | -0.8517 | -0.5180                   | N                  | -0.07763 | -1.8339  | 0.35477                   | N                 | -0.28117 | -1.70488 | -0.03597 |
| H                 | 2.1270  | -0.2551 | 0.6771                    | H                  | -2.49621 | -0.23006 | 0.032614                  | H                 | 2.303262 | -0.39305 | 0.256184 |
| C                 | 3.9851  | -0.9760 | 0.2125                    | C                  | -4.50888 | -0.7139  | -0.13573                  | C                 | 4.247657 | -1.07111 | 0.308178 |
| C                 | 4.5575  | -0.0731 | 1.1237                    | C                  | -4.85643 | 0.647258 | -0.15387                  | C                 | 4.711038 | 0.245492 | 0.46457  |
| C                 | 4.8058  | -1.8850 | -0.4676                   | C                  | -5.51229 | -1.6853  | -0.2695                   | C                 | 5.169198 | -2.12473 | 0.238886 |
| C                 | 5.9305  | -0.0918 | 1.3515                    | C                  | -6.18811 | 1.02225  | -0.31545                  | C                 | 6.076289 | 0.499971 | 0.543423 |
| H                 | 3.9270  | 0.6450  | 1.6361                    | H                  | -4.08919 | 1.404223 | -0.02791                  | H                 | 4.001748 | 1.064139 | 0.524202 |
| C                 | 6.1801  | -1.8777 | -0.2264                   | C                  | -6.83823 | -1.28226 | -0.42436                  | C                 | 6.533571 | -1.84324 | 0.319618 |
| H                 | 4.3826  | -2.5828 | -1.1822                   | H                  | -5.26415 | -2.7417  | -0.24454                  | H                 | 4.826396 | -3.14984 | 0.135982 |
| C                 | 6.7593  | -0.9919 | 0.6808                    | C                  | -7.19448 | 0.065966 | -0.45358                  | C                 | 7.004931 | -0.53972 | 0.469002 |
| H                 | 7.8273  | -1.0007 | 0.8596                    | H                  | -8.22818 | 0.363752 | -0.57861                  | H                 | 8.067427 | -0.33871 | 0.528085 |
| C                 | 7.0583  | -2.8107 | -1.0188                   | C                  | -7.90209 | -2.32668 | -0.63597                  | C                 | 7.518168 | -2.97428 | 0.172024 |
| C                 | 6.5179  | 0.8351  | 2.3826                    | C                  | -6.55283 | 2.483268 | -0.28111                  | C                 | 6.559855 | 1.906327 | 0.777783 |
| F                 | 7.3962  | -2.2766 | -2.2175                   | F                  | -8.08698 | -2.59248 | -1.9525                   | F                 | 8.702438 | -2.69413 | 0.760209 |
| F                 | 8.2142  | -3.0879 | -0.3753                   | F                  | -7.59384 | -3.49917 | -0.04128                  | F                 | 7.057721 | -4.12136 | 0.715781 |
| F                 | 6.4460  | -3.9869 | -1.2756                   | F                  | -9.10102 | -1.93073 | -0.14975                  | F                 | 7.780821 | -3.23685 | -1.13097 |
| F                 | 7.8018  | 1.1512  | 2.1036                    | F                  | -6.79225 | 2.911445 | 0.980766                  | F                 | 5.675732 | 2.829202 | 0.338881 |
| F                 | 5.8269  | 1.9932  | 2.4756                    | F                  | -5.57347 | 3.263078 | -0.78377                  | F                 | 6.760287 | 2.150901 | 2.095034 |
| F                 | 6.5120  | 0.2764  | 3.6163                    | F                  | -7.67564 | 2.735842 | -0.99495                  | F                 | 7.73573  | 2.142895 | 0.15541  |
| H                 | -0.5191 | -0.2810 | 0.3152                    | H                  | -0.18683 | -0.81763 | 0.244254                  | H                 | -0.06191 | -0.71287 | 0.037843 |
| C                 | -2.0244 | -1.3295 | -0.7879                   | C                  | 1.24209  | -2.45074 | 0.259338                  | C                 | -1.67196 | -2.14085 | 0.071838 |
| C                 | -2.5728 | -2.1093 | 0.4124                    | C                  | 2.023529 | -2.01555 | -0.98273                  | C                 | -2.37965 | -1.56053 | 1.302343 |
| C                 | -2.7978 | -3.5217 | 0.3723                    | C                  | 3.029313 | -2.87113 | -1.54027                  | C                 | -3.59352 | -2.16016 | 1.775979 |
| C                 | -2.8285 | -1.4304 | 1.5864                    | C                  | 1.789282 | -0.79747 | -1.58393                  | C                 | -1.8747  | -0.48351 | 1.996062 |
| C                 | -2.5582 | -4.3493 | -0.7599                   | C                  | 3.340552 | -4.17131 | -1.0539                   | C                 | -4.1849  | -3.32828 | 1.21879  |
| C                 | -3.2981 | -4.1159 | 1.5794                    | C                  | 3.745617 | -2.35974 | -2.67052                  | C                 | -4.22002 | -1.53501 | 2.90171  |
| C                 | -3.3249 | -2.1083 | 2.7333                    | C                  | 2.532389 | -0.38943 | -2.72909                  | C                 | -2.56092 | 0.059268 | 3.120876 |



|   |         |         |         |   |          |          |          |   |          |          |          |
|---|---------|---------|---------|---|----------|----------|----------|---|----------|----------|----------|
| H | -2.6370 | -0.3647 | 1.6426  | H | 1.026886 | -0.13606 | -1.19118 | H | -0.94433 | -0.02751 | 1.689901 |
| C | -2.8073 | -5.7090 | -0.6960 | C | 4.334394 | -4.92459 | -1.65568 | C | -5.3581  | -3.84186 | 1.74684  |
| H | -2.1468 | -3.9255 | -1.6658 | H | 2.782866 | -4.59069 | -0.22688 | H | -3.7019  | -3.84215 | 0.398843 |
| C | -3.5476 | -5.5184 | 1.6003  | C | 4.769166 | -3.16041 | -3.25424 | C | -5.43547 | -2.08168 | 3.404011 |
| C | -3.3120 | -6.2957 | 0.4980  | C | 5.06156  | -4.40415 | -2.76214 | C | -5.99416 | -3.19931 | 2.844502 |
| H | -3.9287 | -5.9483 | 2.5212  | H | 5.30242  | -2.75317 | -4.10733 | H | -5.89626 | -1.5869  | 4.252961 |
| H | -3.4966 | -7.3654 | 0.5070  | H | 5.835075 | -5.02366 | -3.20482 | H | -6.91532 | -3.62759 | 3.226755 |
| O | -2.6025 | -6.5850 | -1.7140 | O | 4.700553 | -6.17584 | -1.27777 | O | -5.99145 | -4.9586  | 1.3045   |
| N | -3.5523 | -3.4160 | 2.7136  | N | 3.493623 | -1.15105 | -3.23469 | N | -3.70973 | -0.45094 | 3.539497 |
| C | -2.1249 | -6.0772 | -2.9600 | C | 4.004076 | -6.79271 | -0.1966  | C | -5.41548 | -5.69064 | 0.22539  |
| H | -2.0219 | -6.9447 | -3.6130 | H | 4.448088 | -7.78214 | -0.08301 | H | -6.06898 | -6.54893 | 0.06579  |
| H | -1.1551 | -5.5804 | -2.8470 | H | 2.935278 | -6.89285 | -0.41875 | H | -4.40642 | -6.03936 | 0.474556 |
| H | -2.8419 | -5.3713 | -3.3968 | H | 4.133642 | -6.22508 | 0.733064 | H | -5.38025 | -5.08561 | -0.68905 |
| C | -3.6089 | -1.3819 | 4.0025  | C | 2.272927 | 0.918801 | -3.39306 | C | -2.02862 | 1.236393 | 3.863941 |
| C | -3.8414 | -2.1124 | 5.1818  | C | 3.191149 | 1.411453 | -4.33892 | C | -2.86375 | 1.917313 | 4.768287 |
| C | -3.6586 | 0.0223  | 4.0669  | C | 1.129732 | 1.687053 | -3.10888 | C | -0.7099  | 1.697673 | 3.699187 |
| C | -4.1086 | -1.4640 | 6.3847  | C | 2.978863 | 2.633452 | -4.97239 | C | -2.40096 | 3.022542 | 5.477869 |
| H | -3.8067 | -3.1951 | 5.1360  | H | 4.068152 | 0.816645 | -4.56918 | H | -3.87993 | 1.56364  | 4.901378 |
| C | -3.9281 | 0.6694  | 5.2735  | C | 0.919411 | 2.910601 | -3.74628 | C | -0.2472  | 2.804122 | 4.413963 |
| H | -3.4992 | 0.6269  | 3.1793  | H | 0.384445 | 1.337401 | -2.40154 | H | -0.02664 | 1.200101 | 3.019117 |
| C | -4.1528 | -0.0678 | 6.4374  | C | 1.841384 | 3.391086 | -4.67743 | C | -1.08896 | 3.47292  | 5.304397 |
| H | -4.2801 | -2.0491 | 7.2844  | H | 3.701807 | 2.995361 | -5.69873 | H | -3.06622 | 3.534878 | 6.167798 |
| H | -3.9647 | 1.7551  | 5.3004  | H | 0.028817 | 3.486952 | -3.51217 | H | 0.777546 | 3.138428 | 4.276211 |
| H | -4.3606 | 0.4393  | 7.3757  | H | 1.674761 | 4.344641 | -5.17084 | H | -0.72663 | 4.334198 | 5.858872 |
| C | -2.0153 | 0.2131  | -3.4313 | C | 1.531562 | -0.07474 | 2.590106 | C | -0.97243 | -1.00949 | -3.03735 |
| C | -3.2195 | -0.5468 | -4.0371 | C | 1.108103 | -0.72807 | 3.924594 | C | -1.32036 | -2.10564 | -4.06804 |
| H | -1.6778 | 1.0404  | -4.0593 | H | 1.999096 | 0.90219  | 2.71712  | H | -0.73447 | -0.05037 | -3.49673 |
| C | -3.0162 | -0.1983 | -1.1570 | C | 2.09278  | -2.34296 | 1.55842  | C | -2.50475 | -1.95377 | -1.25259 |
| C | -3.4764 | 1.8933  | -2.3642 | C | 3.7616   | -1.09115 | 2.868772 | C | -3.36889 | -0.4712  | -2.98996 |
| C | -4.4873 | -0.2208 | -3.2217 | C | 1.79128  | -2.10163 | 4.052951 | C | -2.63589 | -2.77689 | -3.63932 |
| H | -3.0279 | -1.6248 | -4.0224 | H | 0.021012 | -0.8464  | 3.948061 | H | -0.51365 | -2.84404 | -4.10837 |
| H | -3.3536 | -0.2569 | -5.0836 | H | 1.3848   | -0.08577 | 4.766169 | H | -1.41969 | -1.67695 | -5.07079 |
| H | -3.2297 | 0.3946  | -0.2689 | H | 3.017816 | -2.88192 | 1.339128 | H | -3.53077 | -1.75621 | -0.93735 |
| C | -4.3167 | -0.7698 | -1.7914 | C | 1.421287 | -2.94041 | 2.814186 | C | -2.48485 | -3.20397 | -2.16651 |
| C | -4.6571 | 1.3233  | -3.1938 | C | 3.326591 | -1.87482 | 4.142545 | C | -3.77917 | -1.73555 | -3.80254 |
| H | -3.7810 | 2.2427  | -1.3757 | H | 4.55201  | -1.59779 | 2.311282 | H | -4.15912 | -0.12462 | -2.3209  |
| H | -2.9660 | 2.7158  | -2.8677 | H | 4.099548 | -0.07898 | 3.092878 | H | -3.08714 | 0.36316  | -3.63344 |
| H | -5.3624 | -0.6788 | -3.6913 | H | 1.448656 | -2.60685 | 4.959732 | H | -2.84455 | -3.64861 | -4.2657  |
| H | -5.1796 | -0.5173 | -1.1693 | H | 1.731987 | -3.98284 | 2.924453 | H | -3.29064 | -3.87954 | -1.86398 |
| H | -4.2700 | -1.8630 | -1.8287 | H | 0.333451 | -2.94109 | 2.696022 | H | -1.5482  | -3.75823 | -2.03648 |
| H | -4.5711 | 1.6818  | -4.2263 | H | 3.508747 | -1.23363 | 5.011738 | H | -3.81773 | -1.45883 | -4.86201 |
| H | -1.9321 | -1.9894 | -1.6472 | H | 1.05222  | -3.52592 | 0.183447 | H | -1.62028 | -3.22462 | 0.211097 |
| N | -2.4367 | 0.8200  | -2.1212 | N | 2.582811 | -0.94505 | 1.923845 | N | -2.15971 | -0.76281 | -2.12928 |
| C | -5.9867 | 1.7846  | -2.6545 | C | 4.118639 | -3.14471 | 4.332005 | C | -5.13949 | -2.26152 | -3.41649 |
| C | -6.8914 | 2.4615  | -3.3632 | C | 4.807188 | -3.4381  | 5.435791 | C | -6.14354 | -2.44566 | -4.27509 |
| H | -6.2020 | 1.5389  | -1.6137 | H | 4.114382 | -3.85746 | 3.506099 | H | -5.29664 | -2.50116 | -2.3638  |

|   |         |         |         |   |          |          |          |   |          |          |          |
|---|---------|---------|---------|---|----------|----------|----------|---|----------|----------|----------|
| H | -7.8416 | 2.7651  | -2.9325 | H | 5.354398 | -4.37143 | 5.534564 | H | -7.10575 | -2.83411 | -3.95284 |
| H | -6.7164 | 2.7377  | -4.4013 | H | 4.848252 | -2.75657 | 6.283159 | H | -6.04122 | -2.2134  | -5.33345 |
| C | 0.6401  | 4.0839  | -1.8561 | C | 5.205021 | 2.949009 | -0.19386 | C | -2.62197 | 3.610755 | -0.25463 |
| C | -0.3969 | 4.9526  | -2.2125 | C | 5.381966 | 3.598772 | 1.041543 | C | -3.26005 | 4.150863 | -1.37668 |
| C | -0.1632 | 6.0097  | -3.0953 | C | 6.112985 | 4.779138 | 1.102098 | C | -4.11251 | 5.248458 | -1.24679 |
| C | 1.1101  | 6.2092  | -3.6331 | C | 6.669729 | 5.317023 | -0.06629 | C | -4.33696 | 5.81848  | 0.009162 |
| C | 2.1502  | 5.3426  | -3.2853 | C | 6.496466 | 4.676766 | -1.29645 | C | -3.70707 | 5.281295 | 1.13581  |
| C | 1.9136  | 4.2862  | -2.4044 | C | 5.765136 | 3.492684 | -1.36145 | C | -2.85573 | 4.183279 | 1.003342 |
| H | -1.3848 | 4.7842  | -1.7968 | H | 4.944571 | 3.163375 | 1.934492 | H | -3.08567 | 3.688183 | -2.34272 |
| H | -0.9778 | 6.6774  | -3.3647 | H | 6.253883 | 5.284768 | 2.052704 | H | -4.6048  | 5.658156 | -2.12533 |
| H | 1.2908  | 7.0300  | -4.3222 | H | 7.24005  | 6.240174 | -0.01477 | H | -5.00287 | 6.671382 | 0.111345 |
| H | 3.1427  | 5.4850  | -3.7048 | H | 6.928417 | 5.100789 | -2.1977  | H | -3.8851  | 5.712075 | 2.117774 |
| H | 2.7253  | 3.6083  | -2.1463 | H | 5.615714 | 2.989266 | -2.31339 | H | -2.37677 | 3.761917 | 1.885116 |
| C | 0.3970  | 2.9304  | -0.8894 | C | 4.438905 | 1.704422 | -0.28826 | C | -1.72255 | 2.400922 | -0.40035 |
| O | -0.9322 | 2.5626  | -0.7794 | H | 4.380373 | 1.254494 | -1.29444 | H | -1.71518 | 1.826422 | 0.542647 |
| C | -0.5300 | 6.5859  | 1.9161  | O | 3.877432 | 1.159619 | 0.661941 | O | -1.82357 | 1.710387 | -1.51047 |
| C | 0.4281  | 5.6849  | 1.4436  | H | 2.935992 | -0.42953 | 1.096955 | H | -1.97333 | 0.185415 | -1.61606 |
| C | 0.0522  | 4.3718  | 1.1614  | C | 1.10259  | 6.223768 | 1.769479 | C | 0.173472 | 6.381524 | -2.04907 |
| C | -1.2773 | 3.9745  | 1.3474  | C | 1.260125 | 4.945261 | 1.26462  | C | 0.030087 | 5.461982 | -1.01482 |
| C | -2.2411 | 4.8743  | 1.8034  | C | 0.143456 | 4.085067 | 1.092915 | C | 0.225727 | 4.092376 | -1.25115 |
| C | -1.8591 | 6.1849  | 2.0932  | C | -1.13342 | 4.593345 | 1.459617 | C | 0.567566 | 3.680451 | -2.55274 |
| H | -0.2389 | 7.6071  | 2.1458  | C | -1.27626 | 5.896378 | 1.972588 | C | 0.69457  | 4.608777 | -3.59956 |
| H | 1.4564  | 6.0026  | 1.2944  | C | -0.17023 | 6.713887 | 2.13035  | C | 0.500947 | 5.959455 | -3.34715 |
| C | 0.9346  | 3.3078  | 0.5843  | H | 1.97548  | 6.861424 | 1.888739 | H | 0.027822 | 7.43921  | -1.84755 |
| C | -1.5979 | 2.5578  | 1.0330  | H | 2.248251 | 4.584399 | 0.98961  | H | -0.2401  | 5.798386 | -0.01846 |
| H | -3.2659 | 4.5415  | 1.9348  | C | 0.260205 | 2.762499 | 0.577949 | C | -0.00159 | 3.064305 | -0.22487 |
| H | -2.5946 | 6.8941  | 2.4619  | C | -2.31258 | 3.754165 | 1.300492 | C | 0.841552 | 2.268048 | -2.81113 |
| C | 0.7543  | 2.0186  | 1.3366  | H | -2.27196 | 6.238625 | 2.237251 | H | 0.959375 | 4.252276 | -4.58961 |
| O | 1.6524  | 1.2604  | 1.6774  | H | -0.27827 | 7.719847 | 2.524665 | H | 0.608263 | 6.685976 | -4.14676 |
| O | -0.5250 | 1.6492  | 1.5231  | C | -0.85331 | 1.962704 | 0.420207 | C | 0.735207 | 1.826907 | -0.41113 |
| O | -2.7148 | 2.0606  | 1.0358  | O | -0.92772 | 0.776095 | -0.02902 | O | 0.974244 | 0.992489 | 0.47168  |
| H | -1.1641 | -0.4409 | -3.2488 | O | -2.10123 | 2.484158 | 0.785474 | O | 1.062671 | 1.458168 | -1.68225 |
| H | 1.9912  | 3.5745  | 0.5520  | O | -3.46338 | 4.052356 | 1.574635 | O | 0.983166 | 1.734457 | -3.88758 |
| H | 1.0324  | 2.0834  | -1.2076 | H | 1.227393 | 2.366928 | 0.291675 | H | 0.041361 | 3.411267 | 0.805104 |
| H | -1.6422 | 1.3425  | -1.6384 | H | 0.703314 | 0.042357 | 1.896704 | H | -0.13671 | -1.28963 | -2.40164 |

**Complex 16b**

**TS 16b-17b**

**Complex 17b**

|   |          |          |          |   |          |          |          |   |          |          |          |
|---|----------|----------|----------|---|----------|----------|----------|---|----------|----------|----------|
| C | 0.827863 | -4.1422  | -0.04513 | C | 0.858396 | -4.03006 | -0.02695 | C | -1.23881 | -3.54549 | -1.18521 |
| C | 0.724165 | -2.66916 | -0.09784 | C | 0.750824 | -2.56148 | 0.032708 | C | -0.82139 | -2.30991 | -0.49965 |
| C | 2.117499 | -2.50585 | 0.025645 | C | 2.145541 | -2.39571 | 0.126822 | C | 0.460146 | -2.82727 | -0.22396 |
| C | 2.338369 | -3.97559 | 0.097805 | C | 2.372715 | -3.86899 | 0.080128 | C | 0.128332 | -4.13491 | -0.84812 |
| O | 3.288605 | -4.73385 | 0.208409 | O | 3.328315 | -4.62643 | 0.099912 | O | 0.68782  | -5.20479 | -1.03272 |
| O | 0.035647 | -5.06934 | -0.10238 | O | 0.063934 | -4.95324 | -0.13211 | O | -2.23934 | -3.89586 | -1.80204 |
| N | 2.842381 | -1.36104 | 0.060808 | N | 2.86079  | -1.25289 | 0.225984 | N | 1.495849 | -2.20095 | 0.376041 |
| N | -0.30162 | -1.82469 | -0.25843 | N | -0.28117 | -1.70488 | -0.03597 | N | -1.38479 | -1.12181 | -0.26573 |
| H | 2.298234 | -0.4972  | 0.032942 | H | 2.303262 | -0.39305 | 0.256184 | H | 1.310606 | -1.22029 | 0.627716 |

|   |          |          |          |   |          |          |          |   |          |          |          |
|---|----------|----------|----------|---|----------|----------|----------|---|----------|----------|----------|
| C | 4.227713 | -1.18261 | 0.166837 | C | 4.247657 | -1.07111 | 0.308178 | C | 2.810559 | -2.63635 | 0.569261 |
| C | 4.703085 | 0.137878 | 0.201139 | C | 4.711038 | 0.245492 | 0.46457  | C | 3.717391 | -1.69748 | 1.087182 |
| C | 5.138804 | -2.24664 | 0.23754  | C | 5.169198 | -2.12473 | 0.238886 | C | 3.25241  | -3.9308  | 0.264661 |
| C | 6.06868  | 0.3875   | 0.301578 | C | 6.076289 | 0.499971 | 0.543423 | C | 5.049699 | -2.04516 | 1.278217 |
| H | 4.003466 | 0.965664 | 0.152133 | H | 4.001748 | 1.064139 | 0.524202 | H | 3.369986 | -0.69857 | 1.327624 |
| C | 6.501729 | -1.97022 | 0.340644 | C | 6.533571 | -1.84324 | 0.319618 | C | 4.591611 | -4.26069 | 0.481738 |
| H | 4.787651 | -3.2738  | 0.214245 | H | 4.826396 | -3.14984 | 0.135982 | H | 2.565125 | -4.66333 | -0.14896 |
| C | 6.985031 | -0.66182 | 0.372898 | C | 7.004931 | -0.53972 | 0.469002 | C | 5.503455 | -3.33303 | 0.983691 |
| H | 8.047073 | -0.46541 | 0.452164 | H | 8.067427 | -0.33871 | 0.528085 | H | 6.540724 | -3.6033  | 1.137578 |
| C | 7.474277 | -3.11163 | 0.489232 | C | 7.518168 | -2.97428 | 0.172024 | C | 5.037433 | -5.67451 | 0.211806 |
| C | 6.564561 | 1.808588 | 0.268395 | C | 6.559855 | 1.906327 | 0.777783 | C | 6.033009 | -0.99918 | 1.72887  |
| F | 7.695526 | -3.40866 | 1.792567 | F | 8.702438 | -2.69413 | 0.760209 | F | 4.733621 | -6.49755 | 1.24395  |
| F | 7.030683 | -4.2414  | -0.10067 | F | 7.057721 | -4.12136 | 0.715781 | F | 4.440717 | -6.18977 | -0.8851  |
| F | 8.678614 | -2.81779 | -0.05159 | F | 7.780821 | -3.23685 | -1.13097 | F | 6.372833 | -5.75926 | 0.022855 |
| F | 6.810031 | 2.223044 | -0.99763 | F | 5.675732 | 2.829202 | 0.338881 | F | 6.992659 | -1.51245 | 2.525875 |
| F | 5.664333 | 2.671309 | 0.792145 | F | 6.760287 | 2.150901 | 2.095034 | F | 6.667405 | -0.42686 | 0.672917 |
| F | 7.716364 | 1.956862 | 0.958144 | F | 7.73573  | 2.142895 | 0.15541  | F | 5.434318 | 0.007615 | 2.407859 |
| H | -0.10221 | -0.83018 | -0.26427 | H | -0.06191 | -0.71287 | 0.037843 | H | -0.80345 | -0.42074 | 0.226386 |
| C | -1.70126 | -2.24296 | -0.1817  | C | -1.67196 | -2.14085 | 0.071838 | C | -2.77172 | -0.82061 | -0.62281 |
| C | -2.38443 | -1.74516 | 1.096111 | C | -2.37965 | -1.56053 | 1.302343 | C | -3.66725 | -0.7452  | 0.61716  |
| C | -3.59879 | -2.36152 | 1.545405 | C | -3.59352 | -2.16016 | 1.775979 | C | -4.73763 | -1.66663 | 0.841038 |
| C | -1.86678 | -0.715   | 1.849714 | C | -1.8747  | -0.48351 | 1.996062 | C | -3.42911 | 0.231359 | 1.561507 |
| C | -4.20757 | -3.48146 | 0.913464 | C | -4.1849  | -3.32828 | 1.21879  | C | -5.05128 | -2.76268 | -0.01061 |
| C | -4.20934 | -1.80616 | 2.715315 | C | -4.22002 | -1.53501 | 2.90171  | C | -5.53024 | -1.44304 | 2.016838 |
| C | -2.53846 | -0.23955 | 3.012253 | C | -2.56092 | 0.059268 | 3.120876 | C | -4.24065 | 0.343495 | 2.722272 |
| H | -0.93672 | -0.24588 | 1.558692 | H | -0.94433 | -0.02751 | 1.689901 | H | -2.61947 | 0.939286 | 1.418195 |
| C | -5.3811  | -4.01825 | 1.41534  | C | -5.3581  | -3.84186 | 1.74684  | C | -6.12128 | -3.5889  | 0.283991 |
| H | -3.73898 | -3.93264 | 0.049395 | H | -3.7019  | -3.84215 | 0.398843 | H | -4.42085 | -2.98753 | -0.86048 |
| C | -5.42409 | -2.37647 | 3.192398 | C | -5.43547 | -2.08168 | 3.404011 | C | -6.63489 | -2.30572 | 2.271801 |
| C | -5.99847 | -3.4485  | 2.563108 | C | -5.99416 | -3.19931 | 2.844502 | C | -6.9282  | -3.34554 | 1.431042 |
| H | -5.87326 | -1.9369  | 4.077306 | H | -5.89626 | -1.5869  | 4.252961 | H | -7.2279  | -2.11543 | 3.160685 |
| H | -6.9203  | -3.89323 | 2.92461  | H | -6.91532 | -3.62759 | 3.226755 | H | -7.76288 | -4.01265 | 1.622474 |
| O | -6.03279 | -5.09197 | 0.897639 | O | -5.99145 | -4.9586  | 1.3045   | O | -6.49143 | -4.67084 | -0.44823 |
| N | -3.68566 | -0.76626 | 3.414994 | N | -3.70973 | -0.45094 | 3.539497 | N | -5.2777  | -0.46094 | 2.918971 |
| C | -5.47473 | -5.74313 | -0.24128 | C | -5.41548 | -5.69064 | 0.22539  | C | -5.73758 | -4.98661 | -1.61928 |
| H | -6.14476 | -6.57325 | -0.46768 | H | -6.06898 | -6.54893 | 0.06579  | H | -6.18754 | -5.89343 | -2.02506 |
| H | -4.47136 | -6.12931 | -0.02655 | H | -4.40642 | -6.03936 | 0.474556 | H | -4.6838  | -5.16856 | -1.38128 |
| H | -5.42992 | -5.06537 | -1.10278 | H | -5.38025 | -5.08561 | -0.68905 | H | -5.80615 | -4.17993 | -2.35941 |
| C | -1.99229 | 0.893178 | 3.811168 | C | -2.02862 | 1.236393 | 3.863941 | C | -3.97312 | 1.385433 | 3.749388 |
| C | -2.84144 | 1.600551 | 4.680839 | C | -2.86375 | 1.917313 | 4.768287 | C | -5.00975 | 1.814064 | 4.596344 |
| C | -0.64521 | 1.288455 | 3.727424 | C | -0.7099  | 1.697673 | 3.699187 | C | -2.69769 | 1.953344 | 3.910702 |
| C | -2.36463 | 2.672753 | 5.431557 | C | -2.40096 | 3.022542 | 5.477869 | C | -4.78192 | 2.789409 | 5.564321 |
| H | -3.87945 | 1.295325 | 4.753075 | H | -3.87993 | 1.56364  | 4.901378 | H | -5.99327 | 1.371654 | 4.480041 |
| C | -0.16796 | 2.361369 | 4.482756 | C | -0.2472  | 2.804122 | 4.413963 | C | -2.47004 | 2.927441 | 4.883362 |
| H | 0.04804  | 0.754815 | 3.085538 | H | -0.02664 | 1.200101 | 3.019117 | H | -1.86595 | 1.617153 | 3.298341 |
| C | -1.02486 | 3.060679 | 5.334954 | C | -1.08896 | 3.47292  | 5.304397 | C | -3.51096 | 3.352806 | 5.711001 |

|   |          |          |          |   |          |          |          |   |          |          |          |
|---|----------|----------|----------|---|----------|----------|----------|---|----------|----------|----------|
| H | -3.04029 | 3.208157 | 6.093262 | H | -3.06622 | 3.534878 | 6.167798 | H | -5.59812 | 3.112827 | 6.204798 |
| H | 0.878956 | 2.643399 | 4.410097 | H | 0.777546 | 3.138428 | 4.276211 | H | -1.47479 | 3.347929 | 4.998882 |
| H | -0.65214 | 3.896002 | 5.92129  | H | -0.72663 | 4.334198 | 5.858872 | H | -3.33286 | 4.112991 | 6.466603 |
| C | -1.06135 | -0.71923 | -3.10336 | C | -0.97243 | -1.00949 | -3.03735 | C | -1.97788 | -0.45427 | -3.57566 |
| C | -1.39482 | -1.67463 | -4.28073 | C | -1.32036 | -2.10564 | -4.06804 | C | -3.37918 | -0.2973  | -4.21402 |
| H | -0.83214 | 0.289614 | -3.45758 | H | -0.73447 | -0.05037 | -3.49673 | H | -1.16722 | -0.29368 | -4.28848 |
| C | -2.52126 | -1.89792 | -1.47541 | C | -2.50475 | -1.95377 | -1.25259 | C | -2.87303 | 0.50106  | -1.42567 |
| C | -3.41354 | -0.23088 | -2.93156 | C | -3.36889 | -0.4712  | -2.98996 | C | -1.85413 | 1.975103 | -3.12419 |
| C | -2.69229 | -2.41938 | -3.92598 | C | -2.63589 | -2.77689 | -3.63932 | C | -4.08135 | 0.932473 | -3.60646 |
| H | -0.57758 | -2.388   | -4.43639 | H | -0.51365 | -2.84404 | -4.10837 | H | -3.97866 | -1.19567 | -4.03602 |
| H | -1.52032 | -1.11798 | -5.21685 | H | -1.41969 | -1.67695 | -5.07079 | H | -3.28357 | -0.1826  | -5.29781 |
| H | -3.55061 | -1.77835 | -1.12871 | H | -3.53077 | -1.75621 | -0.93735 | H | -2.64028 | 1.336228 | -0.76144 |
| C | -2.4991  | -3.03878 | -2.5271  | C | -2.48485 | -3.20397 | -2.16651 | C | -4.26102 | 0.701521 | -2.093   |
| C | -3.8444  | -1.3732  | -3.91943 | C | -3.77917 | -1.73555 | -3.80254 | C | -3.19772 | 2.182291 | -3.87649 |
| H | -4.21763 | 0.007838 | -2.22797 | H | -4.15912 | -0.12462 | -2.3209  | H | -1.71292 | 2.683872 | -2.30603 |
| H | -3.18157 | 0.685854 | -3.48144 | H | -3.08714 | 0.36316  | -3.63344 | H | -0.98454 | 2.059616 | -3.77697 |
| H | -2.90731 | -3.19905 | -4.66367 | H | -2.84455 | -3.64861 | -4.2657  | H | -5.05973 | 1.071868 | -4.07441 |
| H | -3.28062 | -3.77237 | -2.29796 | H | -3.29064 | -3.87954 | -1.86398 | H | -4.78266 | 1.539646 | -1.62437 |
| H | -1.54466 | -3.58014 | -2.49751 | H | -1.5482  | -3.75823 | -2.03648 | H | -4.88533 | -0.1841  | -1.93426 |
| H | -3.90669 | -0.95405 | -4.93132 | H | -3.81773 | -1.45883 | -4.86201 | H | -2.99397 | 2.208888 | -4.95286 |
| H | -1.66754 | -3.33507 | -0.12803 | H | -1.62028 | -3.22462 | 0.211097 | H | -3.10491 | -1.63703 | -1.26069 |
| N | -2.20265 | -0.59771 | -2.14228 | N | -2.15971 | -0.76281 | -2.12928 | N | -1.8092  | 0.593648 | -2.50563 |
| C | -5.1923  | -1.95844 | -3.58689 | C | -5.13949 | -2.26152 | -3.41649 | C | -3.85466 | 3.485714 | -3.49862 |
| C | -6.21727 | -2.03514 | -4.43834 | C | -6.14354 | -2.44566 | -4.27509 | C | -4.20324 | 4.431081 | -4.37226 |
| H | -5.32701 | -2.33621 | -2.57181 | H | -5.29664 | -2.50116 | -2.3638  | H | -4.04775 | 3.646021 | -2.43702 |
| H | -7.17123 | -2.46815 | -4.14883 | H | -7.10575 | -2.83411 | -3.95284 | H | -4.68382 | 5.351842 | -4.05339 |
| H | -6.14046 | -1.66553 | -5.45942 | H | -6.04122 | -2.2134  | -5.33345 | H | -4.0191  | 4.321121 | -5.43914 |
| C | -2.60956 | 3.65637  | 0.131305 | C | -2.62197 | 3.610755 | -0.25463 | C | 1.807207 | 4.977649 | 0.613621 |
| C | -3.34152 | 4.311249 | -0.8647  | C | -3.26005 | 4.150863 | -1.37668 | C | 2.299836 | 6.049919 | -0.13644 |
| C | -4.26842 | 5.299073 | -0.5243  | C | -4.11251 | 5.248458 | -1.24679 | C | 2.940301 | 7.120275 | 0.494532 |
| C | -4.47231 | 5.642348 | 0.813651 | C | -4.33696 | 5.81848  | 0.009162 | C | 3.090827 | 7.134392 | 1.881064 |
| C | -3.74771 | 4.987425 | 1.813253 | C | -3.70707 | 5.281295 | 1.13581  | C | 2.589823 | 6.072024 | 2.638645 |
| C | -2.82347 | 3.998517 | 1.473943 | C | -2.85573 | 4.183279 | 1.003342 | C | 1.950776 | 5.005105 | 2.008867 |
| H | -3.18871 | 4.03308  | -1.90172 | H | -3.08567 | 3.688183 | -2.34272 | H | 2.175803 | 6.064217 | -1.21364 |
| H | -4.83328 | 5.798852 | -1.30683 | H | -4.6048  | 5.658156 | -2.12533 | H | 3.318272 | 7.944953 | -0.10362 |
| H | -5.1955  | 6.409337 | 1.07725  | H | -5.00287 | 6.671382 | 0.111345 | H | 3.587986 | 7.967699 | 2.369747 |
| H | -3.90837 | 5.237019 | 2.858544 | H | -3.8851  | 5.712075 | 2.117774 | H | 2.691627 | 6.076146 | 3.720441 |
| H | -2.27624 | 3.484522 | 2.260801 | H | -2.37677 | 3.761917 | 1.885116 | H | 1.555256 | 4.188745 | 2.609466 |
| C | -1.59757 | 2.58088  | -0.22242 | C | -1.72255 | 2.400922 | -0.40035 | C | 1.10553  | 3.783295 | -0.02097 |
| H | -1.68986 | 1.764037 | 0.502527 | H | -1.71518 | 1.826422 | 0.542647 | H | 0.14221  | 3.645283 | 0.480963 |
| O | -1.75919 | 2.096851 | -1.53643 | O | -1.82357 | 1.710387 | -1.51047 | O | 0.735221 | 4.051373 | -1.39408 |
| H | -1.93304 | 1.117322 | -1.51823 | H | -1.97333 | 0.185415 | -1.61606 | H | -0.86202 | 0.52656  | -2.04482 |
| C | 0.161278 | 6.70452  | -1.28762 | C | 0.173472 | 6.381524 | -2.04907 | C | 5.340921 | 1.976046 | -1.52285 |
| C | -0.06536 | 5.607759 | -0.45586 | C | 0.030087 | 5.461982 | -1.01482 | C | 4.325182 | 1.960225 | -0.56513 |
| C | 0.204226 | 4.312824 | -0.90785 | C | 0.225727 | 4.092376 | -1.25115 | C | 3.076656 | 2.513023 | -0.85659 |
| C | 0.715794 | 4.144678 | -2.20375 | C | 0.567566 | 3.680451 | -2.55274 | C | 2.861666 | 3.096406 | -2.11491 |

|   |          |          |          |   |          |          |          |   |          |          |          |
|---|----------|----------|----------|---|----------|----------|----------|---|----------|----------|----------|
| C | 0.928656 | 5.245519 | -3.04754 | C | 0.69457  | 4.608777 | -3.59956 | C | 3.878149 | 3.106034 | -3.07789 |
| C | 0.651183 | 6.526683 | -2.5868  | C | 0.500947 | 5.959455 | -3.34715 | C | 5.118525 | 2.545954 | -2.78096 |
| H | -0.04647 | 7.705225 | -0.92028 | H | 0.027822 | 7.43921  | -1.84755 | H | 6.305004 | 1.536761 | -1.28367 |
| H | -0.45908 | 5.756889 | 0.544385 | H | -0.2401  | 5.798386 | -0.01846 | H | 4.5079   | 1.521668 | 0.411517 |
| C | -0.09354 | 3.10052  | -0.06885 | C | -0.00159 | 3.064305 | -0.22487 | C | 1.91245  | 2.465378 | 0.095115 |
| C | 1.081548 | 2.8091   | -2.68581 | C | 0.841552 | 2.268048 | -2.81113 | C | 1.546547 | 3.706656 | -2.43251 |
| H | 1.323537 | 5.0782   | -4.04389 | H | 0.959375 | 4.252276 | -4.58961 | H | 3.683454 | 3.557399 | -4.04539 |
| H | 0.822411 | 7.385069 | -3.22875 | H | 0.608263 | 6.685976 | -4.14676 | H | 5.910562 | 2.554101 | -3.52393 |
| C | 0.756702 | 1.913221 | -0.43747 | C | 0.735207 | 1.826907 | -0.41113 | C | 0.974893 | 1.261835 | -0.20719 |
| O | 0.965699 | 0.977143 | 0.320972 | O | 0.974244 | 0.992489 | 0.47168  | O | 0.644104 | 0.535341 | 0.782355 |
| O | 1.232257 | 1.80576  | -1.69836 | O | 1.062671 | 1.458168 | -1.68225 | O | 0.594203 | 1.122363 | -1.39718 |
| O | 1.340114 | 2.481249 | -3.81356 | O | 0.983166 | 1.734457 | -3.88758 | O | 1.162782 | 3.954614 | -3.56028 |
| H | 0.072092 | 3.302463 | 0.992697 | H | 0.041361 | 3.411267 | 0.805104 | H | 2.255773 | 2.365411 | 1.126876 |
| H | -0.18983 | -1.07077 | -2.55296 | H | -0.13671 | -1.28963 | -2.40164 | H | -1.83257 | -1.43284 | -3.11833 |

**Cis**

| <b>Complex 15c</b> |          |          | <b>TS 16c-17c</b> |   |          | <b>Complex 17c</b> |          |   |          |          |          |
|--------------------|----------|----------|-------------------|---|----------|--------------------|----------|---|----------|----------|----------|
| C                  | -0.33674 | -3.33474 | 0.945305          | C | 0.436502 | -2.40741           | -1.969   | C | 0.516557 | -2.98287 | -1.44665 |
| C                  | -0.19443 | -1.98655 | 0.374733          | C | 0.351314 | -1.33067           | -0.96884 | C | 0.370188 | -1.74686 | -0.64901 |
| C                  | -1.56725 | -1.92195 | 0.043597          | C | 1.747336 | -1.34873           | -0.74618 | C | 1.754428 | -1.71446 | -0.3636  |
| C                  | -1.81082 | -3.29079 | 0.573754          | C | 1.92245  | -2.50377           | -1.67998 | C | 1.994008 | -2.9843  | -1.09466 |
| O                  | -2.75907 | -4.05358 | 0.68255           | O | 2.833538 | -3.21902           | -2.06014 | O | 2.939082 | -3.72426 | -1.32513 |
| O                  | 0.422006 | -4.12504 | 1.502116          | O | -0.35589 | -2.94359           | -2.73659 | O | -0.23305 | -3.67464 | -2.12517 |
| N                  | -2.25261 | -0.90907 | -0.52611          | N | 2.525462 | -0.56188           | 0.024847 | N | 2.470954 | -0.79547 | 0.325856 |
| N                  | 0.820663 | -1.1223  | 0.262273          | N | -0.70068 | -0.60584           | -0.53651 | N | -0.67192 | -0.96407 | -0.3566  |
| H                  | -1.68798 | -0.08015 | -0.76501          | H | 2.083848 | 0.280384           | 0.405521 | H | 1.957739 | 0.038185 | 0.603967 |
| C                  | -3.61894 | -0.80277 | -0.80975          | C | 3.906903 | -0.64394           | 0.274848 | C | 3.848614 | -0.74248 | 0.575119 |
| C                  | -4.05645 | 0.415814 | -1.35503          | C | 4.480267 | 0.391235           | 1.033288 | C | 4.348611 | 0.437452 | 1.14627  |
| C                  | -4.54595 | -1.82602 | -0.57053          | C | 4.713334 | -1.69696           | -0.17241 | C | 4.727788 | -1.79415 | 0.282101 |
| C                  | -5.40274 | 0.607491 | -1.64379          | C | 5.836856 | 0.361891           | 1.338642 | C | 5.710579 | 0.568077 | 1.400264 |
| H                  | -3.33753 | 1.205015 | -1.54697          | H | 3.865418 | 1.220789           | 1.363097 | H | 3.672553 | 1.256142 | 1.370725 |
| C                  | -5.89061 | -1.61253 | -0.87899          | C | 6.073599 | -1.70042           | 0.143747 | C | 6.086592 | -1.64464 | 0.560335 |
| H                  | -4.22325 | -2.77049 | -0.14233          | H | 4.293584 | -2.49461           | -0.77694 | H | 4.360118 | -2.70385 | -0.18249 |
| C                  | -6.33708 | -0.40474 | -1.4135           | C | 6.651781 | -0.68399           | 0.899537 | C | 6.59675  | -0.4713  | 1.116054 |
| H                  | -7.38484 | -0.25387 | -1.64252          | H | 7.708007 | -0.70024           | 1.13512  | H | 7.65536  | -0.36604 | 1.316273 |
| C                  | -6.86612 | -2.74283 | -0.6782           | C | 6.909431 | -2.84514           | -0.36633 | C | 7.01034  | -2.80631 | 0.300232 |
| C                  | -5.87328 | 1.947502 | -2.14059          | C | 6.41906  | 1.446161           | 2.205842 | C | 6.232853 | 1.888489 | 1.895857 |
| F                  | -6.87125 | -3.59164 | -1.73394          | F | 6.432282 | -4.03698           | 0.062684 | F | 7.015383 | -3.68012 | 1.335539 |
| F                  | -6.56592 | -3.48066 | 0.413064          | F | 6.911765 | -2.89598           | -1.71898 | F | 6.647547 | -3.5045  | -0.79726 |
| F                  | -8.13412 | -2.29815 | -0.52805          | F | 8.196543 | -2.76181           | 0.032847 | F | 8.289076 | -2.40613 | 0.120322 |
| F                  | -6.3354  | 2.720283 | -1.12403          | F | 7.730779 | 1.647054           | 1.95098  | F | 6.408882 | 2.763298 | 0.871269 |
| F                  | -4.88674 | 2.646117 | -2.7427           | F | 5.786869 | 2.628024           | 2.033445 | F | 5.379849 | 2.479171 | 2.762686 |
| F                  | -6.88712 | 1.82932  | -3.02567          | F | 6.319555 | 1.139384           | 3.522072 | F | 7.424593 | 1.768405 | 2.516405 |
| H                  | 0.634686 | -0.25143 | -0.26079          | H | -0.55505 | 0.091555           | 0.191034 | H | -0.52045 | -0.18262 | 0.277235 |
| C                  | 2.210298 | -1.49058 | 0.567713          | C | -2.06537 | -1.15797           | -0.67673 | C | -2.06145 | -1.37308 | -0.63655 |
| C                  | 3.062587 | -1.52072 | -0.70341          | C | -2.49092 | -1.93132           | 0.580951 | C | -2.74596 | -1.81963 | 0.662855 |
| C                  | 3.444945 | -2.75319 | -1.3234           | C | -2.72408 | -3.34466           | 0.564719 | C | -3.04883 | -3.19129 | 0.94273  |

|   |          |          |          |   |          |          |          |   |          |          |          |
|---|----------|----------|----------|---|----------|----------|----------|---|----------|----------|----------|
| C | 3.447455 | -0.33609 | -1.29557 | C | -2.63025 | -1.25241 | 1.774564 | C | -3.05103 | -0.87538 | 1.622469 |
| C | 3.098262 | -4.04495 | -0.8374  | C | -2.60194 | -4.17663 | -0.5835  | C | -2.77577 | -4.27455 | 0.060905 |
| C | 4.223783 | -2.6433  | -2.52359 | C | -3.10515 | -3.93821 | 1.814885 | C | -3.66367 | -3.46389 | 2.211043 |
| C | 4.236781 | -0.32981 | -2.47799 | C | -3.01074 | -1.93207 | 2.96533  | C | -3.6708  | -1.24157 | 2.848014 |
| H | 3.125029 | 0.608647 | -0.8752  | H | -2.43657 | -0.18645 | 1.812412 | H | -2.79675 | 0.165292 | 1.457199 |
| C | 3.510884 | -5.17879 | -1.51541 | C | -2.84892 | -5.53537 | -0.4936  | C | -3.10314 | -5.5697  | 0.422069 |
| H | 2.483337 | -4.14816 | 0.0472   | H | -2.27179 | -3.75991 | -1.52435 | H | -2.27601 | -4.0943  | -0.88087 |
| C | 4.631548 | -3.83549 | -3.18791 | C | -3.35948 | -5.33925 | 1.862305 | C | -3.98913 | -4.81063 | 2.541533 |
| C | 4.288098 | -5.06864 | -2.70215 | C | -3.23876 | -6.11908 | 0.743765 | C | -3.72027 | -5.8366  | 1.675777 |
| H | 5.22264  | -3.73058 | -4.0922  | H | -3.64954 | -5.76527 | 2.81754  | H | -4.45708 | -4.99305 | 3.503768 |
| H | 4.593226 | -5.98206 | -3.20314 | H | -3.42688 | -7.18781 | 0.772198 | H | -3.96366 | -6.86587 | 1.920674 |
| O | 3.230033 | -6.45423 | -1.14083 | O | -2.74513 | -6.41363 | -1.52478 | O | -2.87784 | -6.6711  | -0.34168 |
| N | 4.60701  | -1.45959 | -3.06694 | N | -3.24139 | -3.23891 | 2.968864 | N | -3.96348 | -2.50574 | 3.124959 |
| C | 2.491845 | -6.66112 | 0.063655 | C | -2.36029 | -5.91435 | -2.80604 | C | -2.29168 | -6.49349 | -1.63158 |
| H | 2.379038 | -7.74176 | 0.159214 | H | -2.31591 | -6.78523 | -3.46125 | H | -2.19581 | -7.49511 | -2.05283 |
| H | 1.505317 | -6.1876  | 0.018635 | H | -1.38072 | -5.42569 | -2.76865 | H | -1.30575 | -6.02141 | -1.56433 |
| H | 3.037791 | -6.26991 | 0.93075  | H | -3.10363 | -5.20464 | -3.19011 | H | -2.93809 | -5.88452 | -2.27552 |
| C | 4.676704 | 0.947245 | -3.10292 | C | -3.16079 | -1.21291 | 4.261224 | C | -4.01243 | -0.22046 | 3.875869 |
| C | 5.085142 | 0.958875 | -4.44821 | C | -3.20661 | -1.94768 | 5.45975  | C | -4.19372 | -0.6128  | 5.213747 |
| C | 4.707392 | 2.154963 | -2.38359 | C | -3.26517 | 0.187345 | 4.332256 | C | -4.17312 | 1.137297 | 3.549246 |
| C | 5.499833 | 2.140285 | -5.05808 | C | -3.34408 | -1.30554 | 6.687727 | C | -4.5145  | 0.322289 | 6.195025 |
| H | 5.068013 | 0.027961 | -5.00436 | H | -3.13113 | -3.02818 | 5.408993 | H | -4.07729 | -1.66079 | 5.467866 |
| C | 5.125571 | 3.336999 | -2.9959  | C | -3.40547 | 0.828208 | 5.564057 | C | -4.49823 | 2.071951 | 4.533279 |
| H | 4.42624  | 2.182275 | -1.33508 | H | -3.25202 | 0.789653 | 3.429942 | H | -4.06987 | 1.474331 | 2.522287 |
| C | 5.520404 | 3.33647  | -4.33498 | C | -3.4435  | 0.087604 | 6.746699 | C | -4.66722 | 1.670919 | 5.85982  |
| H | 5.804577 | 2.129066 | -6.10125 | H | -3.37116 | -1.89305 | 7.601715 | H | -4.64351 | -0.0011  | 7.22461  |
| H | 5.145592 | 4.258876 | -2.42113 | H | -3.48881 | 1.911315 | 5.596315 | H | -4.62621 | 3.115474 | 4.258075 |
| H | 5.843026 | 4.258625 | -4.81067 | H | -3.55061 | 0.589617 | 7.704465 | H | -4.91868 | 2.400523 | 6.624826 |
| C | 1.956265 | -1.73909 | 3.669782 | C | -2.45523 | 0.053966 | -3.43318 | C | -1.86817 | -0.59332 | -3.55045 |
| C | 3.40325  | -2.09768 | 4.078464 | C | -3.70566 | -0.79557 | -3.76374 | C | -3.12598 | -1.38704 | -4.00989 |
| H | 1.308464 | -1.54734 | 4.527225 | H | -2.23629 | 0.797863 | -4.20179 | H | -1.44214 | -0.01872 | -4.37976 |
| C | 2.828123 | -0.53455 | 1.613092 | C | -3.11854 | -0.07522 | -1.01301 | C | -2.9047  | -0.28216 | -1.34868 |
| C | 2.4968   | 0.676421 | 3.737937 | C | -3.80639 | 1.839474 | -2.39869 | C | -3.12764 | 1.396764 | -3.04854 |
| C | 4.358974 | -0.99869 | 3.577146 | C | -4.86238 | -0.37232 | -2.83641 | C | -4.36722 | -0.7447  | -3.36104 |
| H | 3.686125 | -3.06214 | 3.645013 | H | -3.48755 | -1.86059 | -3.63154 | H | -3.0515  | -2.43989 | -3.71151 |
| H | 3.471586 | -2.19634 | 5.166075 | H | -3.9843  | -0.6523  | -4.81214 | H | -3.21497 | -1.37023 | -5.10224 |
| H | 2.811617 | 0.486172 | 1.228194 | H | -3.21475 | 0.604207 | -0.16463 | H | -3.10997 | 0.519297 | -0.63494 |
| C | 4.265269 | -0.93504 | 2.041502 | C | -4.48943 | -0.71821 | -1.38149 | C | -4.25835 | -0.90741 | -1.83296 |
| C | 3.938748 | 0.352284 | 4.222009 | C | -5.06599 | 1.158902 | -2.99238 | C | -4.37568 | 0.759099 | -3.74393 |
| H | 2.464368 | 1.576394 | 3.120399 | H | -3.99638 | 2.305635 | -1.43019 | H | -3.43632 | 2.053668 | -2.22882 |
| H | 1.791722 | 0.788492 | 4.563503 | H | -3.3837  | 2.602984 | -3.05193 | H | -2.56352 | 2.010494 | -3.75609 |
| H | 5.384918 | -1.23374 | 3.873572 | H | -5.77941 | -0.89838 | -3.11663 | H | -5.28036 | -1.22825 | -3.72409 |
| H | 4.981864 | -0.21966 | 1.630532 | H | -5.2617  | -0.37626 | -0.68735 | H | -5.10308 | -0.43115 | -1.32529 |
| H | 4.525531 | -1.91518 | 1.627645 | H | -4.43573 | -1.80557 | -1.2729  | H | -4.31049 | -1.9734  | -1.58229 |
| H | 3.918675 | 0.197615 | 5.306666 | H | -5.11723 | 1.378767 | -4.06534 | H | -4.25041 | 0.822513 | -4.83272 |
| H | 2.177561 | -2.48936 | 0.998884 | H | -2.00705 | -1.8462  | -1.51683 | H | -1.97495 | -2.22156 | -1.31171 |

|   |          |                   |          |   |          |                    |          |   |          |          |          |
|---|----------|-------------------|----------|---|----------|--------------------|----------|---|----------|----------|----------|
| N | 1.975521 | -0.45331          | 2.873795 | N | -2.70839 | 0.823376           | -2.16552 | N | -2.20047 | 0.381312 | -2.48031 |
| C | 4.88683  | 1.48856           | 3.927703 | C | -6.32855 | 1.679161           | -2.35484 | C | -5.64882 | 1.476608 | -3.38717 |
| C | 5.697077 | 2.038484          | 4.83328  | C | -7.32833 | 2.25357            | -3.02537 | C | -6.46911 | 2.058961 | -4.26471 |
| H | 4.883522 | 1.872277          | 2.90738  | H | -6.40791 | 1.570857           | -1.2722  | H | -5.8964  | 1.523872 | -2.3251  |
| H | 6.372713 | 2.849118          | 4.574457 | H | -8.22388 | 2.606473           | -2.52131 | H | -7.37645 | 2.567825 | -3.94951 |
| H | 5.716219 | 1.699669          | 5.867522 | H | -7.28929 | 2.3925             | -4.10406 | H | -6.26351 | 2.048944 | -5.33377 |
| C | -1.36548 | 1.155047          | 2.433097 | C | -0.19642 | 3.631053           | -1.63393 | C | 0.594384 | 3.318375 | -1.74903 |
| O | -0.77188 | 0.197888          | 2.931333 | O | -1.20932 | 2.793919           | -1.43625 | O | -0.65842 | 2.896485 | -2.2276  |
| C | 0.373754 | 7.066922          | -0.30347 | C | -1.52083 | 7.049371           | 1.110492 | C | -0.62924 | 7.274857 | 0.080327 |
| C | -0.30514 | 5.951783          | -0.75752 | C | -0.47468 | 6.317463           | 0.550938 | C | 0.196647 | 6.158881 | -0.05831 |
| C | 0.194097 | 4.643063          | -0.51873 | C | -0.50946 | 4.91827            | 0.569662 | C | -0.33653 | 4.872243 | 0.048975 |
| C | 1.418043 | 4.536659          | 0.204109 | C | -1.61514 | 4.275944           | 1.14951  | C | -1.70906 | 4.727338 | 0.299152 |
| C | 2.097434 | 5.685205          | 0.659496 | C | -2.67671 | 5.011424           | 1.697075 | C | -2.54358 | 5.848463 | 0.427039 |
| C | 1.58529  | 6.945258          | 0.412537 | C | -2.625   | 6.400149           | 1.681243 | C | -2.00046 | 7.12281  | 0.31916  |
| H | -0.03234 | 8.055735          | -0.5025  | H | -1.47911 | 8.134953           | 1.102532 | H | -0.20101 | 8.26978  | 0.002734 |
| H | -1.23509 | 6.064798          | -1.30889 | H | 0.371304 | 6.8289             | 0.099899 | H | 1.258067 | 6.289384 | -0.25007 |
| C | -0.47617 | 3.472812          | -0.97387 | C | 0.492876 | 4.066358           | -0.11657 | C | 0.510993 | 3.649348 | -0.18131 |
| C | 1.970805 | 3.223963          | 0.469179 | C | -1.63272 | 2.812475           | 1.198011 | C | -2.28826 | 3.390431 | 0.453462 |
| H | 3.026894 | 5.552027          | 1.204458 | H | -3.51724 | 4.484118           | 2.136302 | H | -3.60102 | 5.701253 | 0.618517 |
| H | 2.10572  | 7.831871          | 0.76156  | H | -3.43462 | 6.980344           | 2.113306 | H | -2.63639 | 7.995976 | 0.424113 |
| C | 0.049182 | 2.215949          | -0.74165 | C | 0.715217 | 2.772955           | 0.554446 | C | -0.02993 | 2.431352 | 0.505702 |
| O | -0.36784 | 1.078294          | -1.08493 | O | 1.752447 | 2.134284           | 0.563561 | O | 0.630571 | 1.470801 | 0.84782  |
| O | 1.253657 | 2.145306          | 0.002862 | O | -0.39262 | 2.166831           | 1.10685  | O | -1.38243 | 2.328342 | 0.65117  |
| O | 3.010995 | 2.966061          | 1.073621 | O | -2.59024 | 2.112882           | 1.460999 | O | -3.45758 | 3.098666 | 0.489262 |
| H | 1.482757 | -2.50904          | 3.05903  | H | -1.56228 | -0.55589           | -3.29422 | H | -1.08509 | -1.26667 | -3.194   |
| H | -1.39201 | 3.547858          | -1.54902 | H | 1.444284 | 4.564084           | -0.29934 | H | 1.526172 | 3.808902 | 0.185279 |
| H | 0.991471 | -0.21197          | 2.633119 | H | -1.86684 | 1.441902           | -1.90348 | H | -0.82887 | 1.93205  | -2.10446 |
| C | -2.80985 | 1.373765          | 2.52245  | C | 0.947408 | 3.173177           | -2.53846 | C | 1.767763 | 2.415234 | -2.11538 |
| C | -3.37356 | 2.458295          | 1.829356 | C | 1.796511 | 4.11966            | -3.12944 | C | 3.068893 | 2.743351 | -1.70193 |
| C | -3.63184 | 0.505924          | 3.263946 | C | 1.156639 | 1.820287           | -2.82041 | C | 1.590921 | 1.301554 | -2.94356 |
| C | -4.75009 | 2.670269          | 1.869436 | C | 2.834299 | 3.723802           | -3.97327 | C | 4.159662 | 1.965674 | -2.08611 |
| H | -2.72997 | 3.117791          | 1.251575 | H | 1.636756 | 5.178684           | -2.93294 | H | 3.244071 | 3.619765 | -1.08287 |
| C | -5.00263 | 0.728781          | 3.311709 | C | 2.193188 | 1.417086           | -3.66583 | C | 2.68407  | 0.520769 | -3.33098 |
| H | -3.17994 | -0.32898          | 3.790162 | H | 0.493745 | 1.085697           | -2.37695 | H | 0.60279  | 1.049632 | -3.312   |
| C | -5.56073 | 1.807896          | 2.61269  | C | 3.037148 | 2.367186           | -4.24403 | C | 3.970108 | 0.846762 | -2.90222 |
| H | -5.19168 | 3.493416          | 1.317247 | H | 3.479925 | 4.472477           | -4.42532 | H | 5.153515 | 2.230344 | -1.73665 |
| H | -5.64263 | 0.064553          | 3.884735 | H | 2.340004 | 0.360435           | -3.8751  | H | 2.525176 | -0.34009 | -3.9744  |
| H | -6.63396 | 1.972941          | 2.646308 | H | 3.842122 | 2.055285           | -4.90406 | H | 4.818307 | 0.238132 | -3.20202 |
| H | -0.80496 | 1.919283          | 1.867495 | H | -0.50244 | 4.64243            | -1.97855 | H | 0.762952 | 4.297314 | -2.21237 |
|   |          | <b>TS 15c-16c</b> |          |   |          | <b>Complex 16c</b> |          |   |          |          |          |
| C | -0.56331 | 2.505305          | -1.83784 | C | 0.206755 | 3.489492           | 0.969302 |   |          |          |          |
| C | -0.45453 | 1.346551          | -0.93543 | C | 0.188688 | 2.140219           | 0.376298 |   |          |          |          |
| C | -1.85999 | 1.253162          | -0.79586 | C | 1.564707 | 2.199536           | 0.060527 |   |          |          |          |
| C | -2.06607 | 2.460985          | -1.65241 | C | 1.676318 | 3.586741           | 0.588169 |   |          |          |          |
| O | -3.00526 | 3.133713          | -2.04321 | O | 2.550365 | 4.43318            | 0.700311 |   |          |          |          |
| O | 0.230672 | 3.182946          | -2.48344 | O | -0.60746 | 4.187256           | 1.566016 |   |          |          |          |

|   |          |          |          |   |          |          |          |
|---|----------|----------|----------|---|----------|----------|----------|
| N | -2.62664 | 0.366579 | -0.12855 | N | 2.345606 | 1.249838 | -0.48996 |
| N | 0.628547 | 0.671565 | -0.49515 | N | -0.75365 | 1.197374 | 0.257174 |
| H | -2.15394 | -0.4701  | 0.234585 | H | 1.875507 | 0.34942  | -0.69816 |
| C | -4.02001 | 0.35813  | 0.065303 | C | 3.728604 | 1.247609 | -0.70914 |
| C | -4.56675 | -0.75943 | 0.714773 | C | 4.288679 | 0.049094 | -1.18035 |
| C | -4.8655  | 1.402237 | -0.33751 | C | 4.559413 | 2.353691 | -0.47572 |
| C | -5.93666 | -0.82252 | 0.962095 | C | 5.660477 | -0.04134 | -1.39809 |
| H | -3.92006 | -1.57913 | 1.00849  | H | 3.640927 | -0.80416 | -1.35564 |
| C | -6.2328  | 1.313619 | -0.07992 | C | 5.929777 | 2.238898 | -0.71191 |
| H | -4.46688 | 2.259454 | -0.86926 | H | 4.142659 | 3.284464 | -0.10226 |
| C | -6.78614 | 0.211116 | 0.572869 | C | 6.499249 | 1.049627 | -1.16987 |
| H | -7.85    | 0.15508  | 0.76363  | H | 7.56556  | 0.974401 | -1.33909 |
| C | -7.11982 | 2.469555 | -0.46277 | C | 6.800298 | 3.45211  | -0.5145  |
| C | -6.4755  | -2.0362  | 1.671805 | C | 6.223161 | -1.36694 | -1.83206 |
| F | -6.6967  | 3.082988 | -1.5891  | F | 6.774578 | 4.267624 | -1.59645 |
| F | -8.39761 | 2.079624 | -0.67065 | F | 6.40016  | 4.195039 | 0.540991 |
| F | -7.153   | 3.414691 | 0.507718 | F | 8.094474 | 3.120648 | -0.30634 |
| F | -7.82279 | -2.03233 | 1.749219 | F | 6.179025 | -2.28159 | -0.82423 |
| F | -6.11075 | -3.18002 | 1.046165 | F | 5.519986 | -1.90188 | -2.85548 |
| F | -6.00212 | -2.12377 | 2.937445 | F | 7.510049 | -1.28039 | -2.22468 |
| H | 0.501636 | -0.09663 | 0.165062 | H | -0.51418 | 0.249718 | -0.0675  |
| C | 1.93194  | 1.37438  | -0.47117 | C | -2.14822 | 1.442734 | 0.641849 |
| C | 2.204662 | 1.984068 | 0.910671 | C | -3.04108 | 1.676433 | -0.58429 |
| C | 2.257788 | 3.396703 | 1.131811 | C | -3.72524 | 2.910432 | -0.8152  |
| C | 2.376896 | 1.137445 | 1.986846 | C | -3.18822 | 0.656578 | -1.50207 |
| C | 2.075517 | 4.384391 | 0.123638 | C | -3.61501 | 4.064411 | 0.010149 |
| C | 2.511305 | 3.815428 | 2.48128  | C | -4.57454 | 2.954622 | -1.97199 |
| C | 2.619731 | 1.648779 | 3.291047 | C | -4.0238  | 0.80807  | -2.64118 |
| H | 2.318768 | 0.065032 | 1.836945 | H | -2.6684  | -0.28287 | -1.34614 |
| C | 2.145745 | 5.729176 | 0.441928 | C | -4.33611 | 5.206376 | -0.29096 |
| H | 1.841901 | 4.089412 | -0.89    | H | -2.92036 | 4.072451 | 0.839206 |
| C | 2.584017 | 5.20992  | 2.764215 | C | -5.31255 | 4.144647 | -2.23489 |
| C | 2.409079 | 6.142863 | 1.777534 | C | -5.20415 | 5.238047 | -1.41848 |
| H | 2.779928 | 5.505199 | 3.790124 | H | -5.95608 | 4.15535  | -3.10889 |
| H | 2.459    | 7.207058 | 1.985974 | H | -5.7571  | 6.151199 | -1.61558 |
| O | 1.973463 | 6.746916 | -0.44175 | O | -4.28817 | 6.364772 | 0.416762 |
| N | 2.687769 | 2.955592 | 3.515637 | N | -4.71049 | 1.925839 | -2.84527 |
| C | 1.722089 | 6.422759 | -1.80923 | C | -3.43391 | 6.425267 | 1.559315 |
| H | 1.597569 | 7.377651 | -2.3214  | H | -3.53369 | 7.438804 | 1.94973  |
| H | 0.813582 | 5.820717 | -1.91951 | H | -2.39034 | 6.2303   | 1.289808 |
| H | 2.569321 | 5.879865 | -2.24621 | H | -3.74938 | 5.704818 | 2.324043 |
| C | 2.805691 | 0.74237  | 4.458847 | C | -4.19055 | -0.28762 | -3.63493 |
| C | 2.795934 | 1.277475 | 5.759708 | C | -5.28983 | -0.27002 | -4.51184 |
| C | 2.994773 | -0.64351 | 4.308615 | C | -3.27553 | -1.34961 | -3.73502 |
| C | 2.9645   | 0.457772 | 6.872678 | C | -5.47248 | -1.28325 | -5.44962 |
| H | 2.652183 | 2.345423 | 5.879655 | H | -5.99599 | 0.550034 | -4.44295 |



|   |          |          |          |   |          |          |          |
|---|----------|----------|----------|---|----------|----------|----------|
| C | 3.165209 | -1.46186 | 5.426209 | C | -3.45889 | -2.36357 | -4.67557 |
| H | 3.020266 | -1.09972 | 3.323801 | H | -2.39896 | -1.38562 | -3.09576 |
| C | 3.14999  | -0.91834 | 6.711934 | C | -4.55827 | -2.33731 | -5.53537 |
| H | 2.948597 | 0.893119 | 7.86845  | H | -6.33212 | -1.25235 | -6.11386 |
| H | 3.311919 | -2.52975 | 5.287678 | H | -2.73691 | -3.17323 | -4.73469 |
| H | 3.281005 | -1.55926 | 7.579637 | H | -4.70076 | -3.12849 | -6.26641 |
| C | 2.413287 | 0.33026  | -3.28647 | C | -1.22837 | 0.656837 | 3.451989 |
| C | 3.487936 | 1.39784  | -3.59934 | C | -2.44929 | 1.274561 | 4.172801 |
| H | 2.303037 | -0.4114  | -4.08009 | H | -0.57338 | 0.101161 | 4.125682 |
| C | 3.134397 | 0.486553 | -0.87557 | C | -2.73835 | 0.266794 | 1.468241 |
| C | 4.080153 | -1.24246 | -2.3589  | C | -2.36903 | -1.51668 | 3.137144 |
| C | 4.735354 | 1.135161 | -2.73062 | C | -3.71784 | 0.485621 | 3.79024  |
| H | 3.091142 | 2.398684 | -3.4002  | H | -2.56171 | 2.326845 | 3.892932 |
| H | 3.748063 | 1.359226 | -4.66141 | H | -2.29206 | 1.243377 | 5.254666 |
| H | 3.352384 | -0.21256 | -0.06969 | H | -2.96139 | -0.56009 | 0.794185 |
| C | 4.37156  | 1.352631 | -1.24823 | C | -3.99291 | 0.678524 | 2.28497  |
| C | 5.181875 | -0.33475 | -2.96345 | C | -3.46855 | -1.01476 | 4.110918 |
| H | 4.375495 | -1.70136 | -1.41389 | H | -2.76315 | -2.16949 | 2.357456 |
| H | 3.771961 | -2.04016 | -3.03577 | H | -1.57041 | -2.05857 | 3.644622 |
| H | 5.542035 | 1.815263 | -3.0178  | H | -4.57144 | 0.847118 | 4.369733 |
| H | 5.214986 | 1.104324 | -0.59826 | H | -4.85753 | 0.089885 | 1.967655 |
| H | 4.152703 | 2.411781 | -1.08025 | H | -4.2401  | 1.726715 | 2.089526 |
| H | 5.223401 | -0.50011 | -4.04651 | H | -3.08553 | -1.07115 | 5.136417 |
| H | 1.836442 | 2.167331 | -1.20921 | H | -2.13859 | 2.335478 | 1.264987 |
| N | 2.839148 | -0.42654 | -2.05541 | N | -1.72791 | -0.33757 | 2.433373 |
| C | 6.538492 | -0.66448 | -2.39543 | C | -4.70705 | -1.87049 | 4.032481 |
| C | 7.592727 | -1.02452 | -3.12887 | C | -5.24841 | -2.5028  | 5.074273 |
| H | 6.641576 | -0.59981 | -1.31164 | H | -5.17392 | -1.96355 | 3.05115  |
| H | 8.5547   | -1.24377 | -2.67381 | H | -6.14962 | -3.10074 | 4.971348 |
| H | 7.534438 | -1.11321 | -4.212   | H | -4.80998 | -2.44868 | 6.068794 |
| C | 0.737528 | -3.65517 | -1.6706  | C | 1.149873 | -4.03279 | 1.158493 |
| O | 1.742765 | -2.79208 | -1.16697 | O | -0.0651  | -4.07437 | 1.946612 |
| C | 1.224407 | -6.87068 | 1.615177 | C | -1.33781 | -5.36959 | -2.77244 |
| C | 0.326749 | -6.20077 | 0.776452 | C | -0.29121 | -4.60865 | -2.24971 |
| C | 0.566959 | -4.86758 | 0.451798 | C | -0.22806 | -4.34343 | -0.87842 |
| C | 1.695437 | -4.21473 | 0.961495 | C | -1.23588 | -4.84576 | -0.04048 |
| C | 2.596434 | -4.87999 | 1.789509 | C | -2.29284 | -5.60045 | -0.56805 |
| C | 2.354039 | -6.21665 | 2.116961 | C | -2.34109 | -5.86741 | -1.93254 |
| H | 1.040252 | -7.90879 | 1.877336 | H | -1.36787 | -5.58166 | -3.83765 |
| H | -0.54689 | -6.71319 | 0.382475 | H | 0.484599 | -4.22352 | -2.90599 |
| C | -0.24632 | -4.01124 | -0.48976 | C | 0.877995 | -3.51534 | -0.26902 |
| C | 1.859732 | -2.77896 | 0.573274 | C | -1.21626 | -4.54683 | 1.412165 |
| H | 3.465458 | -4.35262 | 2.17041  | H | -3.06056 | -5.96984 | 0.103869 |
| H | 3.042915 | -6.74788 | 2.767543 | H | -3.15314 | -6.45962 | -2.34351 |
| C | -0.59877 | -2.72962 | 0.244277 | C | 0.548986 | -1.99852 | -0.3131  |
| O | -1.735   | -2.26745 | 0.321138 | O | 1.323408 | -1.27735 | -0.98706 |

|   |          |          |          |   |          |          |          |
|---|----------|----------|----------|---|----------|----------|----------|
| O | 0.433904 | -2.10262 | 0.787755 | O | -0.48571 | -1.60243 | 0.309132 |
| O | 2.776698 | -2.05003 | 0.937833 | O | -2.17787 | -4.68415 | 2.147652 |
| H | 1.433512 | 0.765157 | -3.09554 | H | -0.62405 | 1.397732 | 2.931332 |
| H | -1.15203 | -4.50124 | -0.84846 | H | 1.790808 | -3.65549 | -0.8519  |
| H | 2.127513 | -1.13944 | -1.76501 | H | -0.95853 | -0.72035 | 1.847182 |
| C | 0.125058 | -3.06399 | -2.9335  | C | 2.186285 | -3.2401  | 1.940928 |
| C | -1.05182 | -2.30356 | -2.96268 | C | 3.430636 | -2.95742 | 1.357166 |
| C | 0.819633 | -3.26662 | -4.13717 | C | 1.949248 | -2.81781 | 3.25498  |
| C | -1.513   | -1.75358 | -4.16237 | C | 4.407867 | -2.25818 | 2.065525 |
| H | -1.62856 | -2.148   | -2.05791 | H | 3.650905 | -3.28014 | 0.343843 |
| C | 0.364501 | -2.71338 | -5.3347  | C | 2.929767 | -2.1196  | 3.964908 |
| H | 1.723424 | -3.87241 | -4.13305 | H | 1.001056 | -3.04829 | 3.725987 |
| C | -0.80651 | -1.95082 | -5.34962 | C | 4.160453 | -1.83434 | 3.373161 |
| H | -2.43144 | -1.17272 | -4.16588 | H | 5.358543 | -2.04445 | 1.587321 |
| H | 0.915446 | -2.88769 | -6.25512 | H | 2.728467 | -1.80252 | 4.98485  |
| H | -1.16934 | -1.52285 | -6.28003 | H | 4.921604 | -1.2899  | 3.925214 |
| H | 1.193678 | -4.61559 | -1.95777 | H | 1.495829 | -5.07158 | 1.062206 |

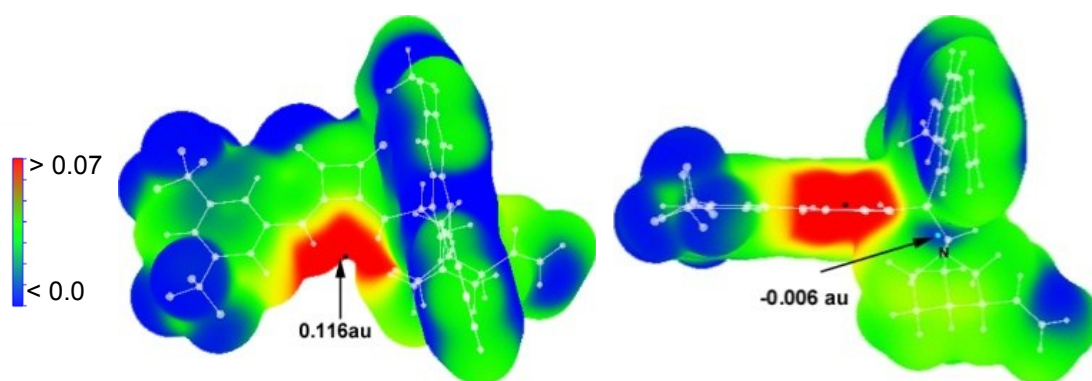

**Fig. S1** Molecular electrostatic potential (MEP) on the 0.001 a.u. electron density isosurface of the catalyst **3**

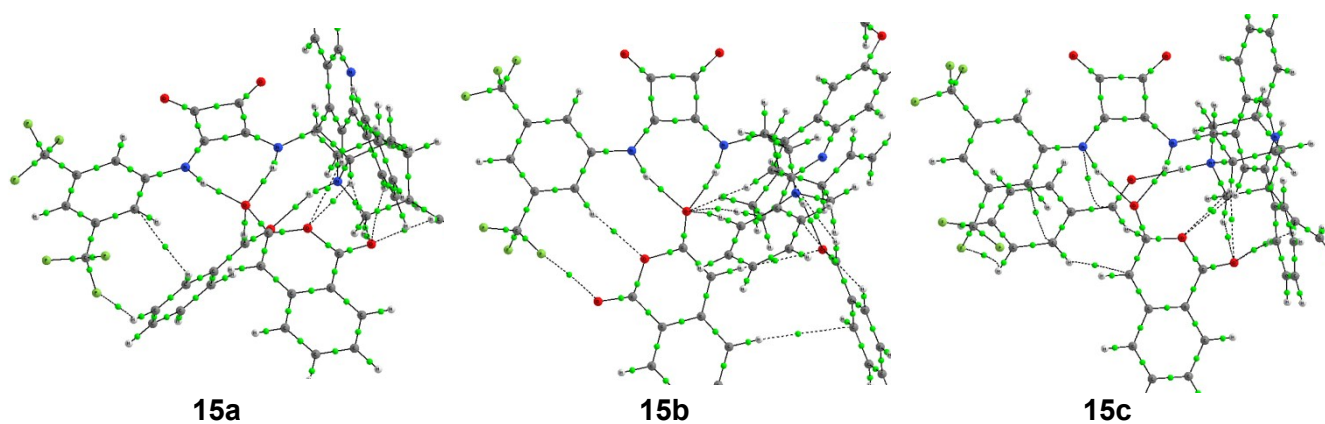

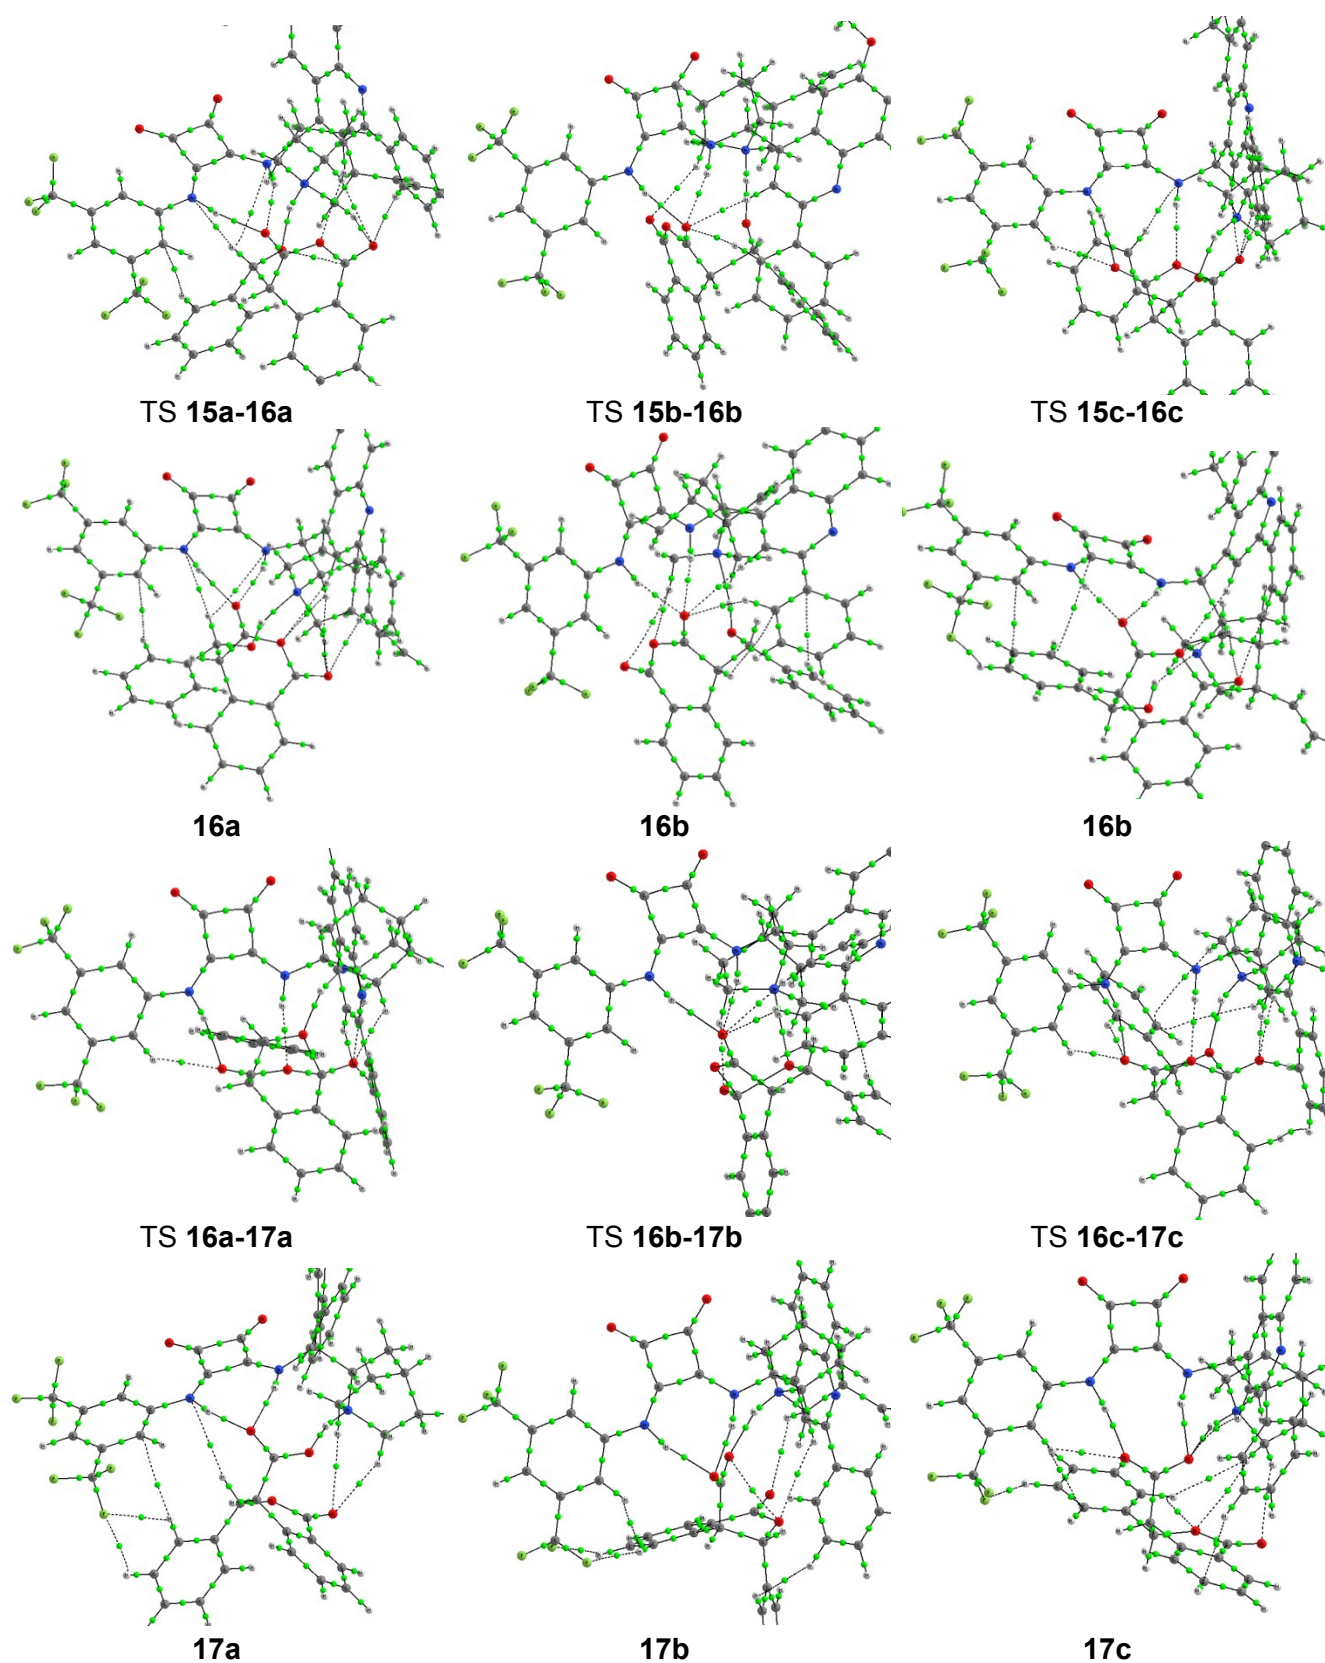

**Fig. S2** Molecular graphs corresponding to complexes **7**, **8** and **9**, as well as transition states for all pathways studied, *trans*-(*R,R*), *trans*-(*S,S*) and *Cis*. Green dots correspond to bond critical points.

**Table S2.** Electron density [ $\rho(\text{BCP})$ , a.u.] and Laplacian [ $\nabla^2\rho(\text{BCP})$ , a.u.] calculated at B3LYP/6-31+G(d,p) in PCM-THF computational level, using the QTAIM theory.

| <i>trans-(R,R)</i>                              | 15a    |                | TS 15a_16a |                | 16a    |                | TS16a_17a |                | 17a    |                    |
|-------------------------------------------------|--------|----------------|------------|----------------|--------|----------------|-----------|----------------|--------|--------------------|
| BCP                                             | $\rho$ | $\nabla^2\rho$ | $\rho$     | $\nabla^2\rho$ | $\rho$ | $\nabla^2\rho$ | $\rho$    | $\nabla^2\rho$ | $\rho$ | $\nabla^2\rho$     |
| N <sup>2</sup> H <sup>2</sup> ...O <sup>1</sup> | 0.034  | 0.099          | 0.022      | 0.069          | 0.021  | 0.069          | -         | -              | 0.033  | 0.094              |
| N <sup>3</sup> H <sup>3</sup> ...O <sup>1</sup> | 0.034  | 0.121          | 0.030      | 0.100          | 0.026  | 0.085          | 0.029     | 0.097          | 0.036  | 0.118              |
| N <sup>2</sup> H <sup>2</sup> ...O <sup>2</sup> | -      | -              | -          | -              | -      | -              | 0.013     | 0.044          | -      | -                  |
| N <sup>1</sup> H...O <sup>4</sup>               | 0.034  | 0.105          | 0.069      | 0.196          | -      | -              | 0.054     | 0.159          | 0.044  | 0.146 <sup>a</sup> |
| O <sup>4</sup> H...N <sup>1</sup>               | -      | -              | -          | -              | 0.042  | 0.100          | -         | -              | -      | -                  |
| N <sup>2</sup> ...HC                            | -      | -              | 0.003      | 0.010          | 0.003  | 0.010          | -         | -              | -      | -                  |
| N <sup>3</sup> ...HC                            | -      | -              | 0.003      | 0.011          | 0.003  | 0.010          | -         | -              | 0.004  | 0.013              |
| O...C                                           | -      | -              | 0.013      | 0.042          | -      | -              | 0.082     | 0.129          | -      | -                  |
| <i>trans-(S,S)</i>                              | 15a    |                | TS 15a-16a |                | 16a    |                | TS16a-17a |                | 17a    |                    |
| BCP                                             | $\rho$ | $\nabla^2\rho$ | $\rho$     | $\nabla^2\rho$ | $\rho$ | $\nabla^2\rho$ | $\rho$    | $\nabla^2\rho$ | $\rho$ | $\nabla^2\rho$     |
| N <sup>2</sup> H <sup>2</sup> ...O <sup>1</sup> | 0.038  | 0.127          | 0.022      | 0.068          | 0.015  | 0.052          | 0.019     | 0.060          | 0.038  | 0.109              |
| N <sup>3</sup> H <sup>3</sup> ...O <sup>1</sup> | 0.033  | 0.098          | 0.028      | 0.085          | 0.023  | 0.072          | 0.028     | 0.085          | 0.031  | 0.094              |
| N <sup>1</sup> H...O <sup>4</sup>               | 0.029  | 0.098          | 0.070      | 0.194          | -      | -              | 0.049     | 0.137          | 0.046  | 0.147 <sup>a</sup> |
| O <sup>4</sup> H...N <sup>1</sup>               | -      | -              | -          | -              | 0.041  | 0.100          | -         | -              | -      | -                  |
| O...C                                           | -      | -              | -          | -              | -      | -              | 0.088     | 0.124          | -      | -                  |
| <i>Cis</i>                                      | 15a    |                | TS 15a-16a |                | 16a    |                | TS16a-17a |                | 17a    |                    |
| BCP                                             | $\rho$ | $\nabla^2\rho$ | $\rho$     | $\nabla^2\rho$ | $\rho$ | $\nabla^2\rho$ | $\rho$    | $\nabla^2\rho$ | $\rho$ | $\nabla^2\rho$     |
| N <sup>2</sup> H <sup>2</sup> ...O <sup>1</sup> | 0.034  | 0.100          | -          | -              | 0.020  | 0.063          | -         | -              | 0.033  | 0.097              |
| N <sup>3</sup> H <sup>3</sup> ...O <sup>1</sup> | 0.037  | 0.122          | 0.029      | 0.096          | 0.023  | 0.081          | 0.033     | 0.106          | 0.042  | 0.134              |
| N <sup>2</sup> H <sup>2</sup> ...O <sup>2</sup> | -      | -              | 0.013      | 0.043          | -      | -              | 0.019     | 0.060          | -      | -                  |
| N <sup>1</sup> H...O <sup>4</sup>               | 0.035  | 0.107          | 0.060      | 0.194          | -      | -              | 0.039     | 0.115          | 0.033  | 0.111 <sup>a</sup> |
| O <sup>4</sup> H...N <sup>1</sup>               | -      | -              | -          | -              | 0.024  | 0.061          | -         | -              | -      | -                  |
| O...C                                           | -      | -              | 0.018      | 0.055          | -      | -              | 0.129     | 0.055          | -      | -                  |

<sup>a</sup> The HB is formed between N<sup>1</sup>H and an oxygen atom belonging to the anhydride.

Since the mechanism of the reaction is governed by proton transfers and the intermediates formed are stabilised by HB interactions, the presence of intermolecular hydrogen bonds (HB) in all complexes was studied and their characteristics analysed by means of the Atoms in Molecules (QTAIM) theory.<sup>6, 8</sup> The main characteristics of the HBs found in these complexes within the QTAIM analysis [i.e. electron density at the bond critical point  $\rho(\text{BCP})$ - and Laplacian of such electron density  $\nabla^2\rho(\text{BCP})$ - are summarised in Table S2.

In all structures/complexes considered (15 cases in total), intermolecular HBs were found, characterised by a BCP between the interacting atoms (C, N, O and H, see Fig. S2). The values of the  $\rho(\text{BCP})$  found range from 0.003 to 0.088 a.u. and those of the Laplacian (always positive) from 0.010 to 0.194 a.u. (Table S2), all of them indicative of non-covalent closed-shell interactions such as HBs.<sup>9</sup>

Looking at the first transition state corresponding to the C-C bond formation (TS **15-16**) and that seems to be key in the stereoselectivity of the reaction, it was found that the corresponding  $\rho(\text{BCP})$

value for the  $N^1H \cdots O^4$  interaction in the **trans-(R,R)** pathway, is higher than the corresponding value for the same HB in that TS in the *cis* pathway (0.069 and 0.060 a.u., respectively). It is important to highlight that TS **15a-16a** and complex **16a** present two extra HBs between  $N^2$  and  $N^3$  of the squaramide and the H atom of the aldehyde. Those HBs stabilize the complexes and at the same time constrain the position of the reactants and are used as anchors to orientate the molecules towards the C-C bond formation. When complex **16** is formed, a HB is established between the lone pair of the  $N^1$  of the catalyst and the  $O^4H$  of the aldehyde, the corresponding  $\rho(\text{BCP})$  is 0.042 and 0.024 a.u. for **trans-(R,R)** and *cis* pathways, respectively. This value is consistent with the distance found for this HB in those pathways, 1.841 and 2.104 Å, respectively. There is an exponential relationship between the  $\rho(\text{BCP})$  and HB distances as proved in many works in the literature.<sup>10</sup> Regarding the *cis* pathway, complex **16c** shows  $\pi-\pi$  interactions between the phenyl ring of aldehyde **2** and the phenyl ring of the catalyst as well as a HB between a F atom of a  $CF_3$  group (in the catalyst) and a H atom from the phenyl ring of the aldehyde. The  $\rho(\text{BCP})$  values for those critical points are 0.004 a.u. for the  $\pi-\pi$  interactions and 0.023 a.u. for the  $F \cdots H$  interaction.

For the second transition state, TS **16-17**, which corresponds to the acylation reaction, the  $\rho(\text{BCP})$  values for  $N^1H \cdots O^4$  are 0.054, 0.049 and 0.039 a.u. for the three different pathways, corresponding to  $O \cdots H$  distances of 1.652, 1.711 and 1.799 Å, respectively.

It is worth noting that due to its conformation, all complexes in the **trans-(S,S)** pathway are able to form HBs between O atoms of the anhydride and the di- $CF_3$  substituted phenyl ring of the catalyst. Additionally, the  $\rho(\text{BCP})$  value of the HB corresponding to  $N^1H \cdots O^4$  in complex **16b** is the lowest one in this particular pathway. These characteristics of the electron density of the different complexes and TSs may explain why **trans-(S,S)** is not thermodynamically favourable.

Additionally, electron density shift maps (EDS) were obtained in order to obtain an insight on the changes of the electron density upon complex formation. Since **trans-(R,R)** is the most favourable reaction pathway, we only present the EDS maps for the complexes corresponding to that pathway. The EDS maps were obtained following the procedure reported in ref. <sup>11</sup> and they are depicted in Fig. S3.

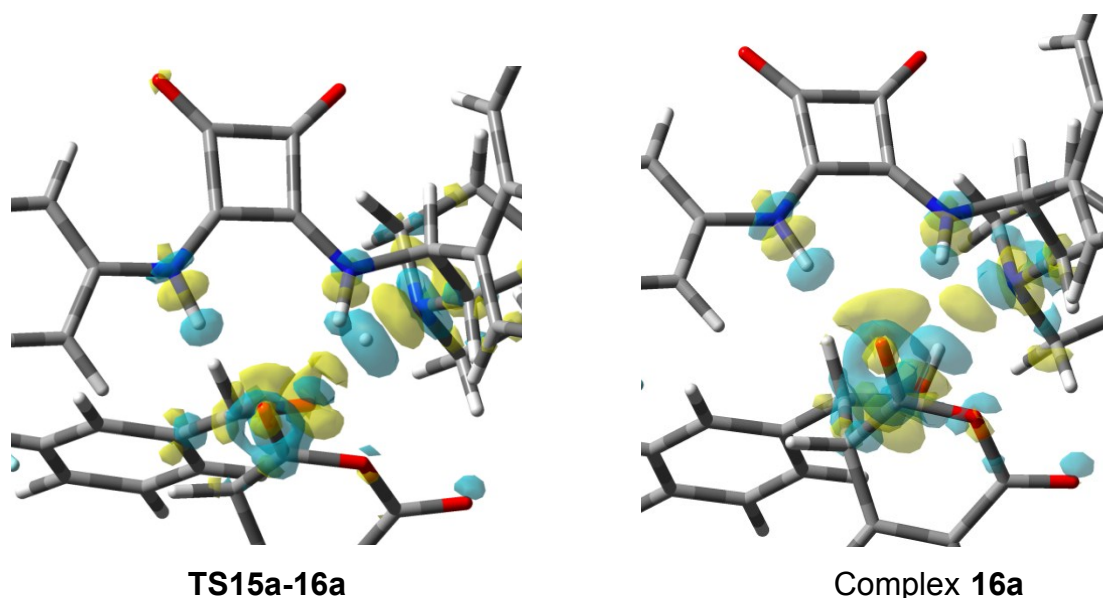

**Fig. S3** Electron Density Shifts maps at 0.003 a.u. of the key structures **TS15a-16a** and complex **16a** for the **trans(R,R)** pathway at B3LYP/6-31+G(d,p) computational level in PCM-THF. Yellow

and blue areas represent positive (increase) and negative (decrease) electron density regions respectively.

The HB donor and acceptor electron density shift pattern is shown only in the intermolecular region. On the one hand, a blue region is observed surrounding the ( $N^{2,3}H^{2,3}$ ) (HB donors), which represents a decrease of the electron density on this area. On the other hand, there is an increase (yellow regions) in the intermolecular electron density on the area located between those H atoms and the nitrogen or oxygen which acts as a HB acceptor.

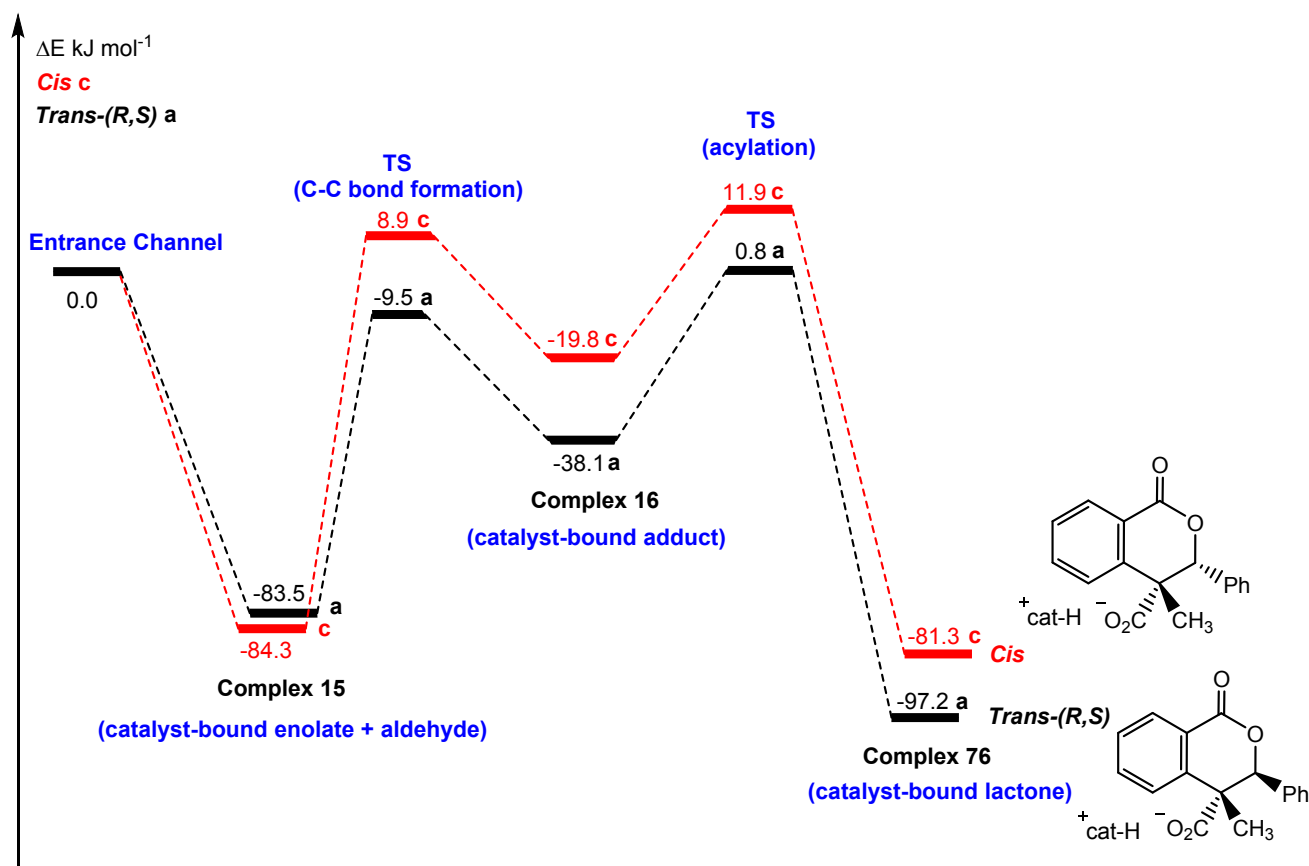

**Fig. S4** Potential energy surface for all complexes formed (**15**, **16** and **17**) along the two pathways corresponding to the two major products for the reaction with methylhomophthalic anhydride.

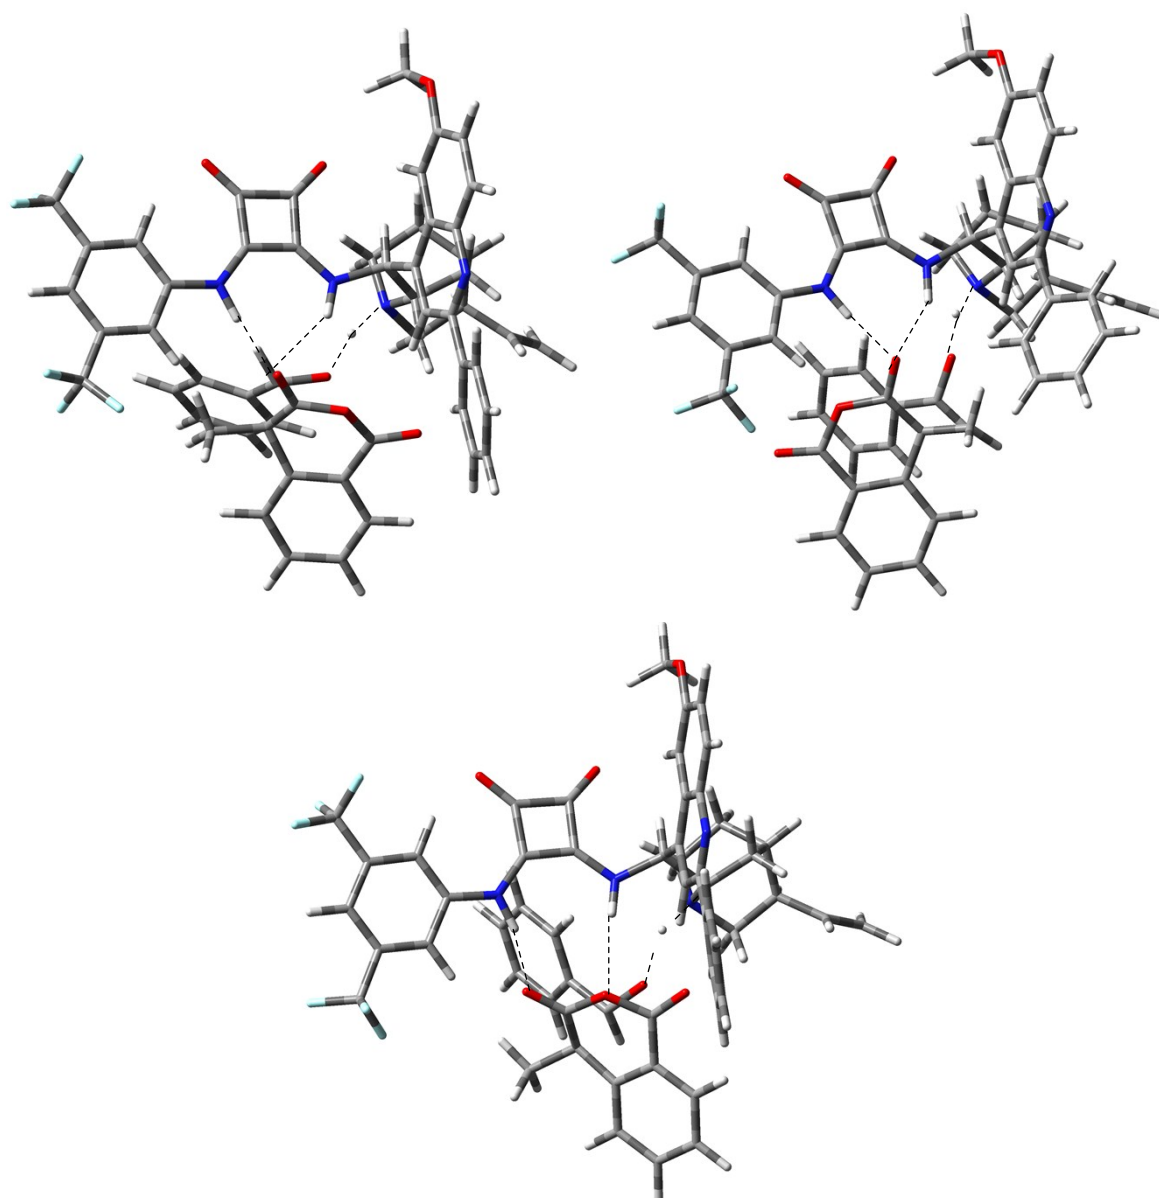

**Fig.S5** Optimised geometries of TS15-16 for *trans-(R,S)* (left), *trans-(S,R)* (right) and *cis* (bottom) pathways corresponding to the reaction with methylhomophthalic anhydride.

**Table S3.** Relative energies ( $\Delta E$ ) respect to the entrance channel at B3LYP/6-31+G(d,p) in PCM-THF corresponding to the reaction with methylhomophthalic anhydride. All values are in  $\text{kJ}\cdot\text{mol}^{-1}$ .

| Complex         | <i>trans-(R,S)</i> | <i>trans-(S,R)</i> | <i>Cis</i> |
|-----------------|--------------------|--------------------|------------|
| <b>15</b>       | -83.5              | -58.6              | -84.3      |
| <b>TS 15_16</b> | -9.5               | 3.9                | 8.9        |
| <b>16</b>       | -38.1              | -31.4              | -19.8      |
| <b>TS 16_17</b> | 0.8                | 16.5               | 11.9       |
| <b>17</b>       | -97.2              | -107.4             | -81.3      |

## References

1. C. Cornaggia, F. Manoni, E. Torrente, S. Tallon and S. J. Connon, *Org. Lett.*, 2012, **14**, 1850-1853.
2. M. Billamboz, F. Bailly, C. Lion, C. Calmels, M.-L. Andréola, M. Witvrouw, F. Christ, Z. Debyser, L. De Luca, A. Chimirri and P. Cotelle, *Eur. J. Med. Chem.*, 2011, **46**, 535-546.
3. (a)A. D. Becke, *J. Chem. Phys.*, 1993, **98**, 5648-5652; (b)C. T. Lee, W. T. Yang and R. G. Parr, *Phys. Rev. B*, 1988, **37**, 785-789.
4. (a)M. J. Frisch, J. A. Pople and J. S. Binkley, *J. Chem. Phys.*, 1984, **80**, 3265-3269; (b)R. Ditchfield, *Mol. Phys.*, 1974, **27**, 789-807.
5. M. J. Frisch, G. W. Trucks, H. B. Schlegel, G. E. Scuseria, M. A. Robb, J. R. Cheeseman, G. Scalmani, V. Barone, B. Mennucci, G. A. Petersson, H. Nakatsuji, M. Caricato, X. Li, H. P. Hratchian, A. F. Izmaylov, J. Bloino, G. Zheng, J. L. Sonnenberg, M. Hada, M. Ehara, K. Toyota, R. Fukuda, J. Hasegawa, M. Ishida, T. Nakajima, Y. Honda, O. Kitao, H. Nakai, T. Vreven, J. Montgomery, J. A., J. E. Peralta, F. Ogliaro, M. Bearpark, J. J. Heyd, E. Brothers, K. N. Kudin, V. N. Staroverov, R. Kobayashi, J. Normand, K. Raghavachari, A. Rendell, J. C. Burant, S. S. Iyengar, J. Tomasi, M. Cossi, N. Rega, N. J. Millam, M. Klene, J. E. Knox, J. B. Cross, V. Bakken, C. Adamo, J. Jaramillo, R. Gomperts, R. E. Stratmann, O. Yazyev, A. J. Austin, R. Cammi, C. Pomelli, J. W. Ochterski, R. L. Martin, K. Morokuma, V. G. Zakrzewski, G. A. Voth, P. Salvador, J. J. Dannenberg, S. Dapprich, A. D. Daniels, Ö. Farkas, J. B. Foresman, J. V. Ortiz, J. Cioslowski and D. J. Fox, *Journal*, 2009.
6. R. F. W. Bader, *Atoms in Molecules: A Quantum Theory*, Clarendon Press, Oxford, 1990.
7. T. A. Keith, *Journal*, 2011, TK Gristmill Software,(aim.tkgristmill.com).
8. (a)I. Rozas, I. Alkorta and J. Elguero, *J. Am. Chem. Soc.*, 2000, **122**, 11154-11161; (b)N. K. V. Monteiro and C. L. Firme, *J. Phys. Chem. A*, 2014, **118**, 1730-1740; (c)F. Fuster and S. J. Grabowski, *J. Phys. Chem. A*, 2011, **115**, 10078-10086.
9. I. Rozas, *Phys. Chem. Chem. Phys.*, 2007, **9**, 2782-2790.
10. (a)G. Sanchez-Sanz, I. Alkorta and J. Elguero, *Mol. Phys.*, 2011, **109**, 2543-2552; (b)G. Sanchez-Sanz, C. Trujillo, I. Alkorta and J. Elguero, *ChemPhysChem*, 2012, **13**, 496-503.
11. G. Sánchez-Sanz, C. Trujillo, I. Alkorta and J. Elguero, *Comput. Theor. Chem.*, 2012, **991**, 124-133.
